# Supplementary material
Source: ML conference proceedings conference paper supplement (https://proceedings.neurips.cc/paper_files/paper/2023/hash/daca83eba0a30a5ff2a3b9c53ff5a976-Abstract.html)
Supplement: Supplementary file 1 [file daca83eba0a30a5ff2a3b9c53ff5a976-Supplemental-Conference.pdf]

---

# On the Generalization Error of Stochastic Mirror Descent for Quadratically-Bounded Losses: an Improved Analysis

---

Anonymous Author(s)

Affiliation

Address

email

## Abstract

1 In this work, we revisit the generalization error of stochastic mirror descent for  
2 quadratically bounded losses studied in Telgarsky (2022). Quadratically bounded  
3 losses is a broad class of loss functions, capturing both Lipschitz and smooth  
4 functions, for both regression and classification problems. We study the high  
5 probability generalization for this class of losses on linear predictors in both  
6 realizable and non-realizable cases when the data are sampled IID or from a  
7 Markov chain. The prior work relies on an intricate coupling argument between  
8 the iterates of the original problem and those projected onto a bounded domain.  
9 This approach enables blackbox application of concentration inequalities, but  
10 also leads to suboptimal guarantees due in part to the use of a union bound  
11 across all iterations. In this work, we depart significantly from the prior work of  
12 Telgarsky (2022), and introduce a novel approach for establishing high probability  
13 generalization guarantees. In contrast to the prior work, our work directly analyzes  
14 the moment generating function of a novel supermartingale sequence and leverages  
15 the structure of stochastic mirror descent. As a result, we obtain improved bounds  
16 in all aforementioned settings. Specifically, in the realizable case and non-realizable  
17 case with light-tailed sub-Gaussian data, we improve the bounds by a  $\log T$  factor,  
18 matching the correct rates of  $1/T$  and  $1/\sqrt{T}$ , respectively. In the more challenging  
19 case of heavy-tailed polynomial data, we improve the existing bound by a poly  $T$   
20 factor.

## 21 1 Introduction

22 Along with convergence analysis of optimization methods, understanding the generalization of models  
23 trained by these methods on unseen data is an important question in machine learning. However,  
24 despite the number of works attempting to answer it, the problem has not been fully understood, even  
25 in the simplest setting of linear predictors constructed with the standard stochastic gradient/mirror  
26 descent. A great part of prior works [28, 10, 25, 26, 27] focus only on the generalization on linearly  
27 separable data and/or of models trained with specific losses with exponentially decaying tails such as  
28 logistic loss. The question of what we can guarantee beyond these settings remains open.

29 Recently, [30] proposes a new approach to analyze the generalization error with *high probability* of  
30 stochastic mirror descent for a broad class of quadratically bounded losses, beyond the realizable  
31 setting. This class of losses encapsulates both Lipschitz and smooth functions, for both regression  
32 and classification problems. The obtained bounds complement existing in-expectation bounds [7]  
33 and nearly match the counterpart of convergence rates in optimization. While this result pushes  
34 forward the state of the art, the obtained guarantees do not completely resolve the problem. The

central piece of the proposed approach is a “coupling” technique between the iterates of the original problem and those projected onto a bounded domain. In this technique, one first constrains the problem in a bounded domain with a well chosen diameter. The bounded domain diameter allows to apply concentration inequalities as a blackbox and obtain bounds in high probability. Then using an inductive argument and a union bound across all iterations, one can show that the iterates in the original problem coincide with the ones in the constrained problem. Due to the union bound, the success probability decreases from  $1 - \delta$  to  $1 - T\delta$ , where  $T$  is the number of iterations in the algorithm. This loss translates to a milder  $\log T$  factor loss in the guarantee in the case of realizable data, and a more significant poly  $T$  factor loss in the non-realizable setting when the data has polynomial tails. Thus a natural question arises of whether we can obtain a stronger analysis that closes these remaining gaps.

In this paper, we revisit these generalization bounds for quadratically bounded losses by [30]. We introduce a novel approach to analyze the generalization errors of stochastic mirror descent in both realizable and non-realizable cases when the data are sampled IID or from a Markov chain. In all these cases, we remove the need to use the union bound argument, thus preventing the loss in the success probability. This translates to the following improvements:

- In the realizable, and the non-realizable cases with sub-gaussian tailed data and Markovian data, we improve the bounds by a  $\log T$  factor. This improvement comes from analyzing the moment generating function of a martingale difference sequence with well-chosen coefficients. In these cases, we also remove the necessity of using the coupling-based argument used in the same work by [30]. Instead, by solely making use of the problem structure, we arrive at the same conclusion that with high probability, the iterates of stochastic mirror descent for quadratically bounded losses behave as if the problem domain is bounded.
- In the non-realizable case with polynomial tailed data, we improve the existing bound by a poly  $T$  factor. Due to the polynomial dependency on  $\frac{1}{\delta}$ , being able to maintain the same success probability through all iterations is crucial in this case. Unlike the previous work, we rely on a truncation technique. Using a more refined analysis of the truncated random variables, in combination with suitable concentration inequalities and the coupling technique, we improve the existing bounds significantly.

## 1.1 Related Work

Broadly speaking, there is a rich body of works in optimization and generalization that provide convergence guarantees and generalization bounds for stochastic methods. Earlier works often focus on in-expectation bounds [3, 19, 21, 13, 7], and bounds in high probability [11, 23, 9, 8] for problems with bounded domains or under various additional assumptions such as strong convexity, noise with light tails. Recent developments for optimization [20, 5, 15, 18, 6, 12, 4, 14, 24, 17, 16] are able to handle unconstrained problems and relax these assumptions, but also require changes to the algorithm such as gradient clipping. In generalization error analysis, specifically, a number of prior works, including [28, 10, 25, 26, 27], focus only on linearly separable data. Among these, [28, 10, 27] only deal with exponentially tailed losses while [25, 26] show generalization bounds for general smooth convex losses. Our work, similarly to [30], goes beyond the realizable setting and specific losses. We show high probability generalization bounds in both realizable and non-realizable settings for the broad class of quadratically bounded losses, for both regression and classification problems.

The main point of reference for this paper is the work by [30]. This work develops a “coupling” technique to bound the generalization error of stochastic mirror descent for quadratically bounded losses. This technique has been employed in prior works [5, 6, 4, 24, 22, 17] to obtain high probability convergence bounds of stochastic methods in optimization. Our work improves their results by using a different approach that takes a closer look at the mechanism of the concentration inequalities and leverages the problem structure. When the data are bounded or have sub-gaussian tails, analyzing the moment generating function of a novel martingale difference sequence allows us to maintain the same success probability, without using either the coupling technique or the union bound. This new analysis, however, does not change the observation by [30] that the iterates of the unconstrained and the constrained problems coincide with high probability. When the data have a polynomial tail, we rely on a truncation technique. In this case, the coupling technique is necessary but not the union bound, and we are still able to significantly improve the success rate.

In terms of techniques, the work by [16] for optimization is the closest to ours. In this work, the authors develop the whitebox approach to analyzing stochastic methods for optimization with light-tailed noise. In this work, we study generalization errors. Moreover, in all settings, our choice of martingale difference sequences and coefficients are a significant departure from the prior work. In particular, in [16] the choice of coefficients only depends on the problem parameters whereas in the realizable case, our coefficients depend also on the historical data. Our approach also allows for a flexible use of an induction argument without decreasing the success probability, while in [16] the bounds are simpler and can be easily achieved in a single step.

## 2 Preliminaries

In this section, we provide the general set up and necessary notations before analyzing stochastic mirror descent in the subsequent sections. Overall, we closely follow notations used in [30].

**Domain and norms.** In this work, we consider  $\mathcal{X}$ —the domain of the problem—to be a closed convex set or  $\mathbb{R}^d$ . We will use  $\|\cdot\|$  to denote an arbitrary norm on  $\mathcal{X}$  and let  $\|\cdot\|_*$  be its dual norm. We define the Bregman divergence as  $\mathbf{D}_\psi(w; v) = \psi(w) - \psi(v) - \langle \nabla \psi(v), w - v \rangle$  where  $\psi : \mathbb{R}^d \rightarrow \mathbb{R}$  is a differentiable function that is 1-strongly convex with respect to the norm  $\|\cdot\|$ .

**Loss functions.** Each loss function  $\ell : \mathbb{R} \times \mathbb{R} \rightarrow \mathbb{R}_{\geq 0}$  in our consideration can be written using a convex scalar function  $\tilde{\ell}$  in one of the two following forms: 1)  $\ell(y, \hat{y}) = \tilde{\ell}(\text{sign}(y)\hat{y})$  where  $\text{sign}(y) = 1$  if  $y \geq 0$  and  $-1$  otherwise; and 2)  $\ell(y, \hat{y}) = \tilde{\ell}(y - \hat{y})$ . The first form captures classification losses and the second regression losses. We will assume that subgradients  $\partial \ell$  of  $\ell$  in the second argument always exist, and let  $\ell'$  denote a subgradient in  $\partial \ell$ . For a function  $f$ , we also use  $\|\partial f(w)\| := \sup \{\|g\| : g \in \partial f(w)\}$ . We further make the following assumptions, introduced in [30] as quadratic boundedness and self-boundedness.

**Assumption 1.** We assume that  $\ell$  is  $(C_1, C_2)$ -quadratically-bounded, for some constants  $C_1, C_2 \geq 0$ , i.e., for all  $y, \hat{y}$

$$|\ell'(y, \hat{y})| \leq C_1 + C_2 (|y| + |\hat{y}|).$$

This condition captures both classes of Lipschitz and smooth functions. Indeed, Lemma 1.2 from [30] shows that  $\alpha$ -Lipschitz functions are  $(\alpha, 0)$ -quadratically-bounded while  $\beta$ -smooth functions are  $(0, \beta)$ -quadratically-bounded.

**Assumption 2.** In the realizable setting, we assume that  $\ell$  is  $\rho$ -self-bounding, i.e.,  $\tilde{\ell}$  satisfies  $\tilde{\ell}'(z)^2 \leq 2\rho\tilde{\ell}(z)$  for all  $z \in \mathbb{R}$ .

The second assumption is a generalization of smoothness. This assumption is satisfied by smooth losses but also certain non-smooth losses such as the exponential loss. This condition is necessary in the current analysis to prove  $1/T$  rates in the realizable setting. The readers can refer to [29, 30] for more detailed discussion on this assumption.

Assumptions 1 and 2 are satisfied by commonly used loss functions in machine learning. These include the logistic loss  $\ell(y, \hat{y}) = \ln(1 + \exp(-y\hat{y}))$  and the squared loss  $\ell(y, \hat{y}) = \frac{1}{2}(y - \hat{y})^2$  (see Lemma 1.4 in [30]).

For the loss function  $\ell$  and the configuration  $w$ , and sample  $(x, y)$  where  $x$  denotes the attribute and  $y$  the label, we will write  $\ell_{x,y} = \ell(y, w^T x)$ . We state the following crucial lemma which is the same as Lemma A.1 in [30], whose proof will be omitted.

**Lemma 1** (Lemma A.1 in ([30])). *Suppose  $\ell$  is  $(C_1, C_2)$ -quadratically-bounded and  $B_x \geq 0$  is given. Given  $(x, y)$  such that  $\max \{\|x\|_*, |y|\} \leq B_x$  and any  $u, v$ ,*

$$\begin{aligned} \|\partial \ell_{x,y}(u)\|_* &\leq B_x (C_1 + C_2 B_x (1 + \|u\|)) \\ |\ell_{x,y}(u) - \ell_{x,y}(v)| &\leq B_x \|u - v\| (C_1 + C_2 B_x (1 + \|u\|)). \end{aligned}$$

**Risk, IID and Markovian data.** When sample  $(x_i, y_i)$  arrives in iteration  $i$  of an algorithm, we will use the notation  $\ell_i(w) = \ell(y_i, w^T x_i)$ . For an algorithm of  $T$  iterations, we use  $\mathcal{F}_t = \sigma((x_1, y_1), \dots, (x_t, y_t))$  to denote the natural filtration up to and including time  $t$ . When the data are IID and generated from a distribution  $\pi$ , we define the risk

$$\mathcal{R}(w) = \mathbb{E}_{(x,y) \sim \pi} [\ell(y, w^T x)];$$

---

**Algorithm 1** Stochastic Mirror Descent

---

Input  $w_0$ , step size  $\eta$

For  $t$  in  $1 \dots T$

$g_t \in \partial \ell_t(w_{t-1})$

$w_t = \arg \min_{w \in \mathcal{X}} \{ \langle \eta g_t, w \rangle + \mathbf{D}_\psi(w; w_{t-1}) \}$

---

134 In contrast to IID data, Markovian data come from a stochastic process. This setting has also been  
135 considered in [1]. We let  $P_s^t$  be the distribution of  $(x_t, y_t)$  at iteration  $t$  conditioned on  $\mathcal{F}_s$ . We make  
136 the following assumption regarding the uniform mixing time of the stochastic process. Note that  
137 similar assumptions have also appeared in [30, 1].

138 **Assumption 3.** We assume that for some  $\epsilon, \tau \geq 0$  of our choice, there is a distribution  $\pi$  such that

$$\sup_{t \in \mathbb{Z}_{\geq 0}} \sup_{\mathcal{F}_t} \text{TV}(P_t^{t+\tau}, \pi) \leq \epsilon.$$

139 We refer to the triple  $(\pi, \tau, \epsilon)$  as an approximate stationarity witness. We then define the risk according  
140 to the approximate stationary distribution  $\pi$ :  $\mathcal{R}(w) = \mathbb{E}_{(x,y) \sim \pi} [\ell(y, w^T x)]$ .

141 **Algorithm.** Stochastic Mirror Descent is given in Algorithm 1. In this algorithm, for the simplicity of  
142 the analysis, we consider a fixed step size  $\eta$ . In each iteration, we pick a subgradient  $g_t \in \partial \ell_t(w_{t-1})$   
143 and perform the update step.

144 We finally introduce a standard lemma used in the analysis of Stochastic Mirror Descent.

145 **Lemma 2.** For  $t \geq 0$  and  $w_{\text{ref}} \in \mathcal{X}$ , we have

$$\mathbf{D}_\psi(w_{\text{ref}}; w_{t+1}) - \mathbf{D}_\psi(w_{\text{ref}}; w_t) \leq \eta(\ell_{t+1}(w_{\text{ref}}) - \ell_{t+1}(w_t)) + \frac{\eta^2}{2} \|g_{t+1}\|_*^2.$$

146 **Other notations.** We will use  $w_{\text{ref}}$  to refer to a comparator of interest. For the simplicity of the  
147 exposition, we let  $D_0 = \mathbf{D}_\psi(w_{\text{ref}}; w_0)$ , and  $\mathcal{R}^* = \inf_{v \in \mathcal{X}} \mathcal{R}(v)$ . For a loss function  $\ell$  that is  
148  $(C_1, C_2)$ -quadratically-bounded, we let  $C_4 = C_1 + C_2(1 + \|w_{\text{ref}}\|)$ .

### 149 3 Generalization bounds of SMD for IID data

150 In this section, we distinguish between two cases: the realizable case and the non-realizable case. In  
151 the realizable case, there exists an optimal solution  $w^* \in \mathcal{X}$  such that  $\mathcal{R}(w^*) = 0$ . We will show that  
152 under mild assumptions, the risks of the solutions output by Algorithm 1 are bounded by  $O(1/T)$ . In  
153 the non-realizable case, we will show, on the other hand, a weaker statement that the excess risks of  
154 the solutions are bounded by  $O(1/\sqrt{T})$ .

#### 155 3.1 Realizable case

156 In the realizable case, the comparator  $w_{\text{ref}}$  is not necessarily the global minimizer. To show the  $1/T$   
157 rate, we will assume  $w_{\text{ref}}$  satisfies  $\mathcal{R}(w_{\text{ref}}) \leq \rho \mathbf{D}_\psi(w_{\text{ref}}; w_0)/T$  and that the loss at  $w_{\text{ref}}$  is bounded.  
158 The guarantee for the iterates of Algorithm 1 is provided in Theorem 3.

159 **Theorem 3.** Suppose  $\ell$  is convex,  $(C_1, C_2)$ -quadratically-bounded, and  $\rho$ -self-bounding. Given  $T$ ,  
160  $((x_t, y_t))_{t \leq T}$  are IID samples with  $\max \{\|x_t\|_*, |y_t|\} \leq 1$  almost surely,  $w_{\text{ref}}$  satisfies  $\mathcal{R}(w_{\text{ref}}) \leq$   
161  $\rho \mathbf{D}_\psi(w_{\text{ref}}; w_0)/T$ , and  $\max_{t < T} \ell_{t+1}(w_{\text{ref}}) \leq C_3$  almost surely. Then for  $\eta \leq \frac{1}{2\rho}$ , with probability  
162 at least  $1 - 2\delta$ , for every  $0 \leq k \leq T - 1$

$$\frac{1}{k+1} \sum_{t=0}^k \mathcal{R}(w_t) + \frac{16 \mathbf{D}_\psi(w_{\text{ref}}; w_{k+1})}{5(k+1)\eta} \leq \frac{C}{k+1} + 3\mathcal{R}(w_{\text{ref}}).$$

163 where  $C = \frac{16C_4}{5} \log \frac{1}{\delta} \sqrt{\frac{15}{4} D_0 + 4\eta\gamma C_3} + \left( \frac{6}{\eta} D_0 + \frac{32}{5} \gamma C_3 \right)$  with  $\gamma = \max \{1, \log \frac{1}{\delta}\}$ .

164 The analysis of Theorem 3 relies on the use of concentration inequalities. In contrast to existing  
165 works that utilize concentration inequalities as a blackbox, we will make use of the mechanism for

proving concentration inequalities in order to obtain stronger guarantees. The type of concentration inequalities we consider are shown by analyzing the moment generating function of suitably chosen martingale sequences. We will use Lemma 14 (Appendix) which gives a basic inequality that bounds the moment generating function of a bounded random variable. To start the analysis, we use Lemma 2 and Assumption 2 to obtain

**Lemma 4.** *For all  $t \geq 0$ , we have*

$$\mathbf{D}_\psi(w_{\text{ref}}; w_{t+1}) - \mathbf{D}_\psi(w_{\text{ref}}; w_t) \leq \eta \ell_{t+1}(w_{\text{ref}}) - \frac{\eta}{2} \ell_{t+1}(w_t),$$

$$\text{and hence, } \mathbf{D}_\psi(w_{\text{ref}}; w_t) \leq \mathbf{D}_\psi(w_{\text{ref}}; w_0) + \eta \sum_{i=1}^t \ell_i(w_{\text{ref}}) = D_0 + \eta \sum_{i=1}^t \ell_i(w_{\text{ref}}).$$

First, let us pay attention to the term  $\sum_{i=1}^t \ell_i(w_{\text{ref}})$ . Recall that the terms  $\ell_i(w_{\text{ref}})$  are non-negative and bounded by a constant  $C_3$  almost surely. We can analyze the term  $\sum_{i=1}^T \ell_i(w_{\text{ref}})$  which upper bounds all sums  $\sum_{i=1}^t \ell_i(w_{\text{ref}})$  by studying its moment generating function (or via a concentration inequality). We state this bound in the next lemma and defer the proof to the appendix.

**Lemma 5.** *With probability at least  $1 - \delta$ ,  $\sum_{i=1}^T \ell_i(w_{\text{ref}}) \leq \frac{7}{4} T \mathcal{R}(w_{\text{ref}}) + C_3 \log \frac{1}{\delta}$ .*

Lemma 4 and lemma 5 and the assumption that  $\mathcal{R}(w_{\text{ref}}) = O(1/T)$  imply that with probability at least  $1 - \delta$ ,  $\mathbf{D}_\psi(w_{\text{ref}}; w_t)$  is bounded. In other words, with probability at least  $1 - \delta$ , the iterates  $w_t$  all lie in a bounded region. One could therefore proceed to assume that the problem domain is simply this bounded ball around  $w_{\text{ref}}$ . This is the basic idea behind the “coupling” technique demonstrated in [30]. However, the important question is how to obtain a bound for the risk of all iterates even when we are working with a problem with unbounded domain. Here, not paying close attention to the structure of the problem and the blackbox use of concentration inequalities lead to suboptimal bounds. On the other hand, as discussed above, a crucial novelty in our analysis is the choice of a supermartingale difference sequence, defined in the proof below. By working from first principles using moment generating function of this sequence, we derive two conclusions: 1) an improved risk bound can be obtained, and 2) the coupling technique is not necessary.

*Proof Sketch.* Towards bounding the risk  $\sum_{t=0}^k \mathcal{R}(w_t)$ , we define random variables

$$Z_t = \frac{1}{2} z_t \eta (\mathcal{R}(w_t) - \mathcal{R}(w_{\text{ref}}) - \ell_{t+1}(w_{\text{ref}})) + z_t (\mathbf{D}_\psi(w_{\text{ref}}; w_{t+1}) - \mathbf{D}_\psi(w_{\text{ref}}; w_t)) - \frac{3}{16} z_t \eta (\mathcal{R}(w_{\text{ref}}) + \mathcal{R}(w_t)), \quad \forall 0 \leq t \leq T-1$$

$$\text{where } z_t = \frac{1}{\eta C_4 \sqrt{2\eta\gamma C_3 + 2D_0 + 2\eta \sum_{i=1}^t \ell_i(w_{\text{ref}})}}; \quad \gamma = \max \left\{ 1, \log \frac{1}{\delta} \right\}$$

and we let  $S_t = \sum_{i=0}^t Z_i$ ;  $\forall 0 \leq t \leq T-1$ . Using Lemma 4, we can relate  $Z_t$  and  $z_t \eta (\mathcal{R}(w_t) - \mathcal{R}(w_{\text{ref}}) + \ell_{t+1}(w_{\text{ref}}) - \ell_{t+1}(w_t))$ , which is a random variable with expectation 0. By Lemma 4, we can show  $\mathbb{E}[\exp(Z_t) | \mathcal{F}_t] \leq 1$  and hence  $(\exp(S_t))_{t \geq 0}$  is a supermartingale. By Ville’s inequality, we have with probability at least  $1 - \delta$ , for all  $0 \leq k \leq T-1$

$$\sum_{t=0}^k Z_t \leq \log \frac{1}{\delta}$$

Expanding this inequality, in combination with Lemma 5, we obtain the conclusion.  $\square$

**Remark 6.** The new analysis does not change the conclusion observed in [30]—that is, with high probability, the iterate sequence  $(w_t)_{t \geq 0}$  behaves as if the domain of the problem is bounded. We improve the probability that this event happens.

### 3.2 Non-realizable case

In the non-realizable case, we do not aim for  $1/T$  but only  $1/\sqrt{T}$  rates. Hence we do not assume that the comparator  $w_{\text{ref}}$  satisfies  $\mathcal{R}(w_{\text{ref}}) \leq \rho \mathbf{D}_\psi(w_{\text{ref}}; w_0)/T$  but rather the following assumption on the excess risk:

201 **Assumption 4.** Let  $\mathcal{R}^* = \inf_{v \in \mathcal{X}} \mathcal{R}(v)$ , assume that  $\mathcal{R}(w_{\text{ref}}) - \mathcal{R}^* \leq \frac{\mathbf{D}_\psi(w_{\text{ref}}; w_0)}{\sqrt{T}}$ .

202 We also relax the assumption on the data samples. In the previous case, the data are bounded, i.e  
 203  $\{\|x\|_*, |y|\} \leq 1$  a.s. We will consider in this section two settings, one when the data come from a  
 204 sub-Gaussian distribution and one when the data distribution has a polynomial tail.

### 205 3.2.1 IID data with sub-Gaussian tails

206 We will show the following guarantee:

207 **Theorem 7.** Suppose  $\ell$  is convex,  $(C_1, C_2)$ -quadratically-bounded. Given  $T, ((x_t, y_t))_{t \leq T}$  are IID  
 208 samples with  $Q_t = \max \{1, \|x_t\|_*^2, |y_t|^2\}$  and there exists  $\sigma \geq 0$  such that for all  $\lambda$

$$\max \{ \mathbb{E} [\exp (\lambda (Q_t^2 - \mathbb{E} [Q_t^2]))], \mathbb{E} [\exp (\lambda (Q_t - \mathbb{E} [Q_t]))] \} \leq \exp (\lambda^2 \sigma^2)$$

209 Let  $\mu_1 = \mathbb{E} [Q_t]$  and  $\mu_2 = \mathbb{E} [Q_t^2]$ . Suppose that  $w_{\text{ref}}$  satisfies Assumption 4. Then for  $\eta \leq$   
 210  $\frac{1}{4C_2 \sqrt{T\mu_2 + 2\sigma \sqrt{T \log \frac{1}{\delta}}}}$ , with probability at least  $1 - 2\delta$ , for every  $0 \leq k \leq T - 1$

$$\frac{1}{k+1} \sum_{t=0}^k (\mathcal{R}(w_t) - \mathcal{R}^*) + \frac{\mathbf{D}_\psi(w_{\text{ref}}; w_{k+1})}{\eta(k+1)} \leq \frac{R^2}{\eta(k+1)}$$

211 where  $R^2 = 16C_4^2 (\sigma^2 + 4\mu_1^2) \log \frac{1}{\delta} \eta^2 T + 4D_0(1 + \eta\sqrt{T}) + 4\eta^2 C_4^2 (T\mu_2 + 2\sigma \sqrt{T \log \frac{1}{\delta}}) = O(1)$ .

212 **Remark 8.** For zero-mean sub-Gaussian variable  $X$ , the definition  $\mathbb{E} [\exp (\lambda X)] \leq \exp (\lambda^2 \sigma^2)$  for  
 213 all  $\lambda$  is equivalent to  $\mathbb{E} [\exp (\lambda^2 X^2)] \leq \exp (\lambda^2 \sigma^2)$  for all  $0 \leq \lambda \leq \frac{1}{\sigma}$  (see [32]). The lemma  
 214 below shows a property of sub-Gaussian variables under scaling and translating. First let us consider  
 215  $\sum_{t=1}^T Q_t^2$ . Similar to Lemma 5, by bounding the moment generating function of this term, we have  
 216 the following (see also Section B4 in [30]).

217 **Lemma 9.** With probability at least  $1 - \delta$ ,  $\sum_{t=1}^T Q_t^2 \leq T\mu_2 + 2\sigma \sqrt{T \log \frac{1}{\delta}}$ .

218 *Proof of Theorem 7.* The proof of this Theorem uses the technique developed in [16]. We will also  
 219 analyze the moment generating function of a suitable martingale sequence. However, the choice  
 220 of the coefficients will differ significantly from the previous proof. In this case the structure of the  
 221 problem is deeply integrated into the analysis of the martingale. We define

$$\begin{aligned} Z_t &= z_t \eta (\mathcal{R}(w_t) - \mathcal{R}(w_{\text{ref}})) + z_t (\mathbf{D}_\psi(w_{\text{ref}}; w_{t+1}) - \mathbf{D}_\psi(w_{\text{ref}}; w_t)) \\ &\quad - \frac{1}{2} z_t \eta^2 \|g_{t+1}\|_*^2 - 4z_t^2 \eta^2 C_4^2 (\sigma^2 + 4\mu_1^2) \mathbf{D}_\psi(w_{\text{ref}}; w_t) \quad \forall 0 \leq t \leq T-1 \\ \text{where } z_t &= \frac{1}{4\eta^2 C_4^2 (\sigma^2 + 4\mu_1^2) (T+t+1)} \quad \forall -1 \leq t \leq T-1 \end{aligned}$$

222 and let  $S_t = \sum_{i=0}^t Z_i$ ;  $\forall 0 \leq t \leq T-1$ . By Lemma 2, we have

$$Z_t + 4z_t^2 \eta^2 C_4^2 (\sigma^2 + 4\mu_1^2) \mathbf{D}_\psi(w_{\text{ref}}; w_t) \leq z_t \eta (\mathcal{R}(w_t) - \mathcal{R}(w_{\text{ref}})) + \ell_{t+1}(w_{\text{ref}}) - \ell_{t+1}(w_t)$$

223 where we have  $\mathbb{E} [(\mathcal{R}(w_t) - \mathcal{R}(w_{\text{ref}})) + \ell_{t+1}(w_{\text{ref}}) - \ell_{t+1}(w_t)] = 0$ , and using the same notation  
 224  $C_4 = C_1 + C_2(1 + \|w_{\text{ref}}\|)$ , by Lemma 1,

$$\begin{aligned} &|(\mathcal{R}(w_t) - \mathcal{R}(w_{\text{ref}})) + \ell_{t+1}(w_{\text{ref}}) - \ell_{t+1}(w_t)| \\ &\leq |\ell_{t+1}(w_{\text{ref}}) - \ell_{t+1}(w_t)| + |\mathcal{R}(w_t) - \mathcal{R}(w_{\text{ref}})| \\ &\leq |\ell_{t+1}(w_{\text{ref}}) - \ell_{t+1}(w_t)| + \mathbb{E} [|\ell_{x,y}(w_t) - \ell_{x,y}(w_{\text{ref}})|] \\ &\leq (Q_t + \mu_1) \|w_{\text{ref}} - w_t\| C_4 = ((Q_t - \mu_1) + 2\mu_1) \|w_{\text{ref}} - w_t\| C_4 \end{aligned}$$

225 Hence applying Lemma 15, we have

$$\mathbb{E} [\exp (Z_t) \mid \mathcal{F}_t] \exp (4z_t^2 \eta^2 C_4^2 (\sigma^2 + 4\mu_1^2) \mathbf{D}_\psi(w_{\text{ref}}; w_t))$$

$$\begin{aligned}
&= \mathbb{E} [\exp (z_t \eta_t (\mathcal{R}(w_t) - \mathcal{R}(w_{\text{ref}}) + \ell_{t+1}(w_{\text{ref}}) - \ell_{t+1}(w_t))) \mid \mathcal{F}_t] \\
&\leq \exp \left( 2z_t^2 \eta^2 C_4^2 \|w_{\text{ref}} - w_t\|^2 (\sigma^2 + 4\mu_1^2) \right) \\
&\leq \exp \left( 4z_t^2 \eta^2 C_4^2 (\sigma^2 + 4\mu_1^2) \mathbf{D}_\psi(w_{\text{ref}}; w_t) \right)
\end{aligned}$$

226 Therefore  $\mathbb{E} [\exp (Z_t) \mid \mathcal{F}_t] \leq 1$  and hence  $(\exp (S_t))_{t \geq 0}$  is a supermartingale. By Ville's inequality,  
227 we have with probability at least  $1 - \delta$ , for all  $0 \leq k \leq T - 1$

$$\sum_{t=0}^k Z_t \leq \log \frac{1}{\delta}$$

228 Expanding this inequality we have

$$\begin{aligned}
&\sum_{t=0}^k z_t \eta \mathcal{R}(w_t) + z_k \mathbf{D}_\psi(w_{\text{ref}}; w_{k+1}) \\
&\leq \log \frac{1}{\delta} + z_{-1} D_0 + \eta \mathcal{R}(w_{\text{ref}}) \sum_{t=0}^k z_t + \frac{1}{2} \sum_{t=0}^k z_t \eta^2 \|g_{t+1}\|_*^2 \\
&\quad + \sum_{t=0}^k \underbrace{(z_t + 4z_t^2 \eta^2 C_4^2 (\sigma^2 + 4\mu_1^2) - z_{t-1})}_{\leq 0} \mathbf{D}_\psi(w_{\text{ref}}; w_t) \\
&\stackrel{(a)}{\leq} \log \frac{1}{\delta} + z_{-1} D_0 + \eta \mathcal{R}(w_{\text{ref}}) \sum_{t=0}^k z_t + \frac{1}{2} \sum_{t=0}^k z_t \eta^2 \|g_{t+1}\|_*^2
\end{aligned}$$

229 where for (a), by the choice of  $z_t = \frac{1}{4\eta^2 C_4^2 (\sigma^2 + 4\mu_1^2) (T+1+t)}$  we have  $z_{t-1} - z_t \geq$   
230  $4z_t^2 \eta^2 C_4^2 (\sigma^2 + 4\mu_1^2)$ . We highlight that this is where the structure of the problem comes into  
231 play. That is, by setting appropriate coefficients, we can leverage gain in the distance in the  
232 martingale difference sequence  $((z_t - z_{t-1}) \mathbf{D}_\psi(w_{\text{ref}}; w_t))$  to cancel out the loss from bounding the  
233 moment generating function  $(4z_t^2 \eta^2 C_4^2 (\sigma^2 + 4\mu_1^2) \mathbf{D}_\psi(w_{\text{ref}}; w_t))$ . Another important property of  
234 the sequence  $(z_t)$  is that it is a decreasing sequence and  $\frac{z_t}{z_k} \leq 2$  for all  $t, k$ . Hence we have

$$\begin{aligned}
&\eta \sum_{t=0}^k (\mathcal{R}(w_t) - \mathcal{R}^*) + \mathbf{D}_\psi(w_{\text{ref}}; w_{k+1}) \\
&\leq 4C_4^2 (\sigma^2 + 4\mu_1^2) \log \frac{1}{\delta} \eta^2 (T+1+k) + 2D_0 + 2(\mathcal{R}(w_{\text{ref}}) - \mathcal{R}^*) \eta(k+1) + \eta^2 \sum_{t=0}^k \|g_{t+1}\|_*^2.
\end{aligned}$$

235 Combined with Lemma 9, with probability at least  $1 - 2\delta$ , for all  $0 \leq k \leq T - 1$

$$\begin{aligned}
&\eta \sum_{t=0}^k (\mathcal{R}(w_t) - \mathcal{R}^*) + \mathbf{D}_\psi(w_{\text{ref}}; w_{k+1}) \\
&\leq 4C_4^2 (\sigma^2 + 4\mu_1^2) \log \frac{1}{\delta} \eta^2 (T+1+k) + 2D_0 + 2(\mathcal{R}(w_{\text{ref}}) - \mathcal{R}^*) \eta(k+1) + \eta^2 \sum_{t=0}^k \|g_{t+1}\|_*^2; \\
&\text{and } \sum_{t=1}^{k+1} Q_t^2 \leq T\mu_2 + 2\sigma \sqrt{T \log \frac{1}{\delta}}
\end{aligned}$$

236 Conditioned on this event, we will prove by induction that

$$\mathbf{D}_\psi(w_{\text{ref}}; w_k) \leq R^2 := 16C_4^2 (\sigma^2 + 4\mu_1^2) \log \frac{1}{\delta} \eta^2 T + 4D_0 + 4D_0 \eta \sqrt{T} + 4\eta^2 C_4^2 \left( T\mu_2 + 2\sigma \sqrt{T \log \frac{1}{\delta}} \right)$$

237 For the base case  $k = 0$ , it is trivial. Suppose for all  $t \leq k$  we have  $\mathbf{D}_\psi(w_{\text{ref}}; w_t) \leq R^2$ , now we  
238 prove for  $t = k + 1$ . By Lemma 1,

$$\eta^2 \sum_{t=0}^k \|g_{t+1}\|_*^2 \leq \eta^2 \sum_{t=0}^k Q_{t+1}^2 (C_1 + C_2 (1 + \|w_t\|))^2 \leq \eta^2 \sum_{t=0}^k Q_{t+1}^2 (C_4 + C_2 \|w_t - w_{\text{ref}}\|)^2$$

$$\begin{aligned}
&\leq 2\eta^2 C_4^2 \sum_{t=1}^{k+1} Q_t^2 + 2\eta^2 C_2^2 \sum_{t=0}^k Q_{t+1}^2 \|w_t - w_{\text{ref}}\|^2 \\
&\leq \eta^2 (2C_4^2 + 4C_2^2 R^2) \left( T\mu_2 + 2\sigma \sqrt{T \log \frac{1}{\delta}} \right)
\end{aligned}$$

239 Therefore

$$\begin{aligned}
\mathbf{D}_\psi(w_{\text{ref}}; w_{k+1}) &\leq 8C_4^2 (\sigma^2 + 4\mu_1^2) \log \frac{1}{\delta} \eta^2 T + 2D_0 + 2(\mathcal{R}(w_{\text{ref}}) - \mathcal{R}^*) \eta(k+1) \\
&\quad + \eta^2 (2C_4^2 + 4C_2^2 R^2) \left( T\mu_2 + 2\sigma \sqrt{T \log \frac{1}{\delta}} \right) \\
&\leq \frac{R^2}{2} + 4\eta^2 C_2^2 \left( T\mu_2 + 2\sigma \sqrt{T \log \frac{1}{\delta}} \right) R^2 \leq R^2.
\end{aligned}$$

240 Finally we obtain,  $\eta \sum_{t=0}^k (\mathcal{R}(w_t) - \mathcal{R}^*) + \mathbf{D}_\psi(w_{\text{ref}}; w_{k+1}) \leq R^2$ , as needed.  $\square$

### 241 3.2.2 IID data with polynomial tails

242 **Theorem 10.** Suppose  $\ell$  is convex,  $(C_1, C_2)$ -quadratically bounded. Given  $T, ((x_t, y_t))_{t \leq T}$  are IID  
243 samples with  $Q_t = \max \{1, \|x_t\|_*^2, |y_t|^2\}$  and for some  $p \geq 2$  there exists  $M \geq \frac{p}{e}$  such that for all  
244  $\lambda$

$$\max \left\{ \sup_{2 \leq r \leq 2p} \{\mathbb{E}[|Q_t - \mathbb{E}[Q_t]|^r]\}, \sup_{2 \leq r \leq p} \{\mathbb{E}[|Q_t^2 - \mathbb{E}[Q_t^2]|^r]\} \right\} \leq M$$

245 Let  $\mu_1 = \mathbb{E}[Q_t]$  and  $\mu_2 = \mathbb{E}[Q_t^2]$ . Suppose that  $w_{\text{ref}}$  satisfies Assumption 4. Then for  $\eta \leq$   
246  $\frac{1}{C_2 \sqrt{6 \left( T\mu_2 + 2M\sqrt{T} \left( \frac{2}{\delta} \right)^{\frac{1}{p}} \right)}}$ , with probability at least  $1 - 3\delta$ , for every  $0 \leq k \leq T - 1$

$$\frac{1}{k+1} \sum_{t=0}^k (\mathcal{R}(w_t) - \mathcal{R}^*) + \frac{\mathbf{D}_\psi(w_{\text{ref}}; w_{k+1})}{\eta(k+1)} \leq \frac{R^2}{2\eta(k+1)}$$

247 where  $R = \max \left\{ \sqrt{6 \left( D_0 \left( 1 + \eta\sqrt{T} \right) + \eta^2 C_4^2 \left( T\mu_2 + 2M\sqrt{T} \left( \frac{2}{\delta} \right)^{\frac{1}{p}} \right) \right)}, 6 \left( \frac{2}{3} \gamma \left( 7 \left( \frac{MT}{\delta} \right)^{1/2p} + \right. \right. \right.$   
248  $\left. \left. 2\mu_1 \right) + \sqrt{\log \frac{2}{\delta} T\mu_2 \eta C_4} \right\} = O(1)$ ,  $\gamma = \max \{1, \log \frac{2}{\delta}\}$ .

249 **Remark 11.** Since  $p \geq 2$ , the rate is  $O\left(\frac{1}{T^{1/2}} \log \frac{1}{\delta} + \frac{1}{T^{3/4}} \left(\frac{1}{\delta}\right)^{\frac{1}{2p}}\right)$ . This rate improves over  
250 the  $O\left(\left(\frac{1}{T^{1/2}} + \frac{1}{T^{3/4}} \left(\frac{T}{\delta}\right)^{\frac{1}{2p}}\right) \log \frac{T}{\delta}\right)$  rate by [30] by a polynomial factor  $T^{\frac{1}{2p}} \log \frac{T}{\delta}$  in the high  
251 probability regime where  $\delta = \frac{1}{\text{poly}(T)}$ .

252 We will give a proof sketch for this theorem. The full proof is deferred to the appendix.

253 *Proof Sketch.* The heavy tailed distribution of the data does not allow us to analyze the moment  
254 generating function. In this case, we rely on the coupling technique as in [30]. Since it is not  
255 possible to apply Azuma's inequality due to the bounds on the variables being not measurable, and  
256 the variables are heavy tailed, we use truncation technique. We define,

$$v_t = \arg \min_{\|w - w_{\text{ref}}\| \leq R} \{\langle \eta_t g_t(v_{t-1}), w \rangle + \mathbf{D}_\psi(w; v_{t-1})\}$$

257 where we use  $g_t(v_{t-1})$  to denote the gradient at  $v_{t-1}$  using the same data point  $(x_t, y_t)$  when  
258 computing  $w_t$  and we define

$$U_t = (\mathcal{R}(v_t) - \mathcal{R}(w_{\text{ref}}) + \ell_{t+1}(w_{\text{ref}}) - \ell_{t+1}(v_t))$$

$$P_t = \begin{cases} U_t & \text{if } |U_t| \leq (A + 2\mu_1) RC_4 \\ (A + 2\mu_1) RC_4 \text{sign}(U_t) & \text{otherwise} \end{cases}$$

where  $A = \left(\frac{MT}{\delta}\right)^{1/2p}$  and  $B_t = U_t - P_t$ .

259 We can write

$$\sum_{t=0}^k U_t = \sum_{t=0}^k (P_t - \mathbb{E}[P_t | \mathcal{F}_t]) + \sum_{t=0}^k \mathbb{E}[P_t | \mathcal{F}_t] + \sum_{t=0}^k B_t$$

260 We bound  $\sum_{t=0}^k (P_t - \mathbb{E}[P_t | \mathcal{F}_t])$  by applying Freedman's inequality. The terms  $\sum_{t=0}^k \mathbb{E}[P_t | \mathcal{F}_t]$   
 261 and  $\sum_{t=0}^k B_t$  are both the bias terms can be bounded by analyzing the tail of the distribution and  
 262 Markov's inequality. We also use Lemma 12 to bound  $\sum_{t=0}^k \|g_{t+1}(v_t)\|_*^2$ . Finally, using the induction  
 263 technique, we can prove that  $w_t = v_t$  with high probability and obtain the desired result.  $\square$

264 **Lemma 12** (Lemma A.5 from [30]). *With probability  $\geq 1 - \delta$ ,  $\sum_{t=1}^T Q_t^2 \leq T\mu_2 + 2M\sqrt{T} \left(\frac{2}{\delta}\right)^{\frac{1}{p}}$ .*

## 265 4 Generalization bounds of SMD for Markovian data

266 The final result we present in this paper is the following theorem for the case when the data are  
 267 sampled from a Markov chain.

268 **Theorem 13.** *Suppose  $\ell$  is convex,  $(C_1, C_2)$ -quadratically bounded. Given  $T$ ,  $((x_t, y_t))_{t \leq T}$  are  
 269 sampled from a Markov chain with  $\max\{\|x_t\|_*^2, |y_t|^2\} \leq 1$  and  $(\pi, \tau, \epsilon = \frac{1}{\sqrt{T}})$  is an approximate  
 270 stationarity witness. Suppose that  $w_{\text{ref}}$  satisfies Assumption 4. Then for  $\eta \leq \frac{1}{2C_2\sqrt{T(1+2\tau)}}$ , with  
 271 probability at least  $1 - \tau\delta$ , for every  $0 \leq k \leq T - 1$*

$$\frac{1}{k+1} \sum_{t=0}^k (\mathcal{R}(w_t) - \mathcal{R}^*) + \frac{\mathbf{D}_\psi(w_{\text{ref}}; w_{k+1})}{\eta(k+1)} \leq \frac{R^2}{2\eta(k+1)}.$$

272 where  $R = \max\left\{\sqrt{6\left(2D_0 + 2\eta D_0\sqrt{T} + 16\eta^2 C_4^2 T \tau \log \frac{1}{\delta} + 2T\eta^2 C_4^2 + 4\eta^2 \tau T C_4^2\right)}, 6(2\eta\tau C_4 + \right.$   
 273  $\left. 2\eta C_4 \epsilon T + 4\eta\tau C_4)\right\} = O(1)$  and  $C_4 = C_1 + C_2(1 + \|w_{\text{ref}}\|)$ .

274 We will give a proof sketch for this theorem.

275 *Proof Sketch.* The proof of this Theorem follow similarly to that of Theorem 7. The difference here  
 276 is we need to bound  $\tau$  different martingale difference sequences in the form of

$$\mathbb{E}[\ell_{\tau(i+1)+j}(w_{\text{ref}}) | \mathcal{F}_{\tau i+j}] - \mathbb{E}[\ell_{\tau(i+1)+j}(w_{\tau i+j}) | \mathcal{F}_{\tau i+j}] + \ell_{\tau(i+1)+j}(w_{\text{ref}}) - \ell_{\tau(i+1)+j}(w_{\tau i+j})$$

277 for  $0 \leq j \leq \tau - 1$ ,  $0 \leq i \leq \frac{T-1-j}{\tau}$ . We also need the assumption on the approximate stationarity  
 278 witness to see that

$$|\mathcal{R}(w_t) - \mathcal{R}(w_{\text{ref}}) - \mathbb{E}[\ell_{t+\tau}(w_{\text{ref}}) | \mathcal{F}_t] + \mathbb{E}[\ell_{t+\tau}(w_t) | \mathcal{F}_t]| \leq C_4 R \epsilon.$$

279 Now we only need the union bound over  $\tau$  sequences, instead of all iterations. The success probability  
 280 will decrease from  $1 - \delta$  to  $1 - \tau\delta$ .  $\square$

## 281 5 Conclusion

282 In this paper, we show a new approach to analyze the generalization error of SMD for quadratically  
 283 bounded losses. Our approach improves a logarithmic factor for the realizable setting and non-  
 284 realizable setting with light tailed data and a poly  $T$  factor for the non-realizable setting with  
 285 polynomial tailed data from the prior work by [30]. An inherent limitation of the current approach is  
 286 the assumption that we can obtain a fresh sample in each iteration, whereas the setting with finite  
 287 training data is still not well understood. In the realizable setting, we require that the data is bounded,  
 288 as opposed to more relaxed assumptions in the non-realizable settings. We leave the question of  
 289 resolving these issues for future works.

## References

- [1] John C Duchi, Alekh Agarwal, Mikael Johansson, and Michael I Jordan. Ergodic mirror descent. *SIAM Journal on Optimization*, 22(4):1549–1578, 2012.
- [2] David A Freedman. On tail probabilities for martingales. *the Annals of Probability*, pages 100–118, 1975.
- [3] Saeed Ghadimi and Guanghai Lan. Optimal stochastic approximation algorithms for strongly convex stochastic composite optimization i: A generic algorithmic framework. *SIAM Journal on Optimization*, 22(4):1469–1492, 2012.
- [4] Eduard Gorbunov, Marina Danilova, David Dobre, Pavel Dvurechenskii, Alexander Gasnikov, and Gauthier Gidel. Clipped stochastic methods for variational inequalities with heavy-tailed noise. *Advances in Neural Information Processing Systems*, 35:31319–31332, 2022.
- [5] Eduard Gorbunov, Marina Danilova, and Alexander Gasnikov. Stochastic optimization with heavy-tailed noise via accelerated gradient clipping. *Advances in Neural Information Processing Systems*, 33:15042–15053, 2020.
- [6] Eduard Gorbunov, Marina Danilova, Innokentiy Shibaev, Pavel Dvurechensky, and Alexander Gasnikov. Near-optimal high probability complexity bounds for non-smooth stochastic optimization with heavy-tailed noise. *arXiv preprint arXiv:2106.05958*, 2021.
- [7] Moritz Hardt, Ben Recht, and Yoram Singer. Train faster, generalize better: Stability of stochastic gradient descent. In *International conference on machine learning*, pages 1225–1234. PMLR, 2016.
- [8] Nicholas JA Harvey, Christopher Liaw, Yaniv Plan, and Sikander Randhawa. Tight analyses for non-smooth stochastic gradient descent. In *Conference on Learning Theory*, pages 1579–1613. PMLR, 2019.
- [9] Elad Hazan and Satyen Kale. Beyond the regret minimization barrier: optimal algorithms for stochastic strongly-convex optimization. *The Journal of Machine Learning Research*, 15(1):2489–2512, 2014.
- [10] Ziwei Ji and Matus Telgarsky. Risk and parameter convergence of logistic regression. *arXiv preprint arXiv:1803.07300*, 2018.
- [11] Sham M Kakade and Ambuj Tewari. On the generalization ability of online strongly convex programming algorithms. *Advances in Neural Information Processing Systems*, 21, 2008.
- [12] Ali Kavis, Kfir Yehuda Levy, and Volkan Cevher. High probability bounds for a class of nonconvex algorithms with adagrad stepsize. In *International Conference on Learning Representations*, 2021.
- [13] Ahmed Khaled and Peter Richtárik. Better theory for sgd in the nonconvex world. *arXiv preprint arXiv:2002.03329*, 2020.
- [14] Shaojie Li and Yong Liu. High probability guarantees for nonconvex stochastic gradient descent with heavy tails. In *International Conference on Machine Learning*, pages 12931–12963. PMLR, 2022.
- [15] Xiaoyu Li and Francesco Orabona. A high probability analysis of adaptive sgd with momentum. *arXiv preprint arXiv:2007.14294*, 2020.
- [16] Zijian Liu, Ta Duy Nguyen, Thien Hang Nguyen, Alina Ene, and Huy Lê Nguyen. High probability convergence of stochastic gradient methods. *arXiv preprint arXiv:2302.14843*, 2023.
- [17] Zijian Liu, Jiawei Zhang, and Zhengyuan Zhou. Breaking the lower bound with (little) structure: Acceleration in non-convex stochastic optimization with heavy-tailed noise. *arXiv preprint arXiv:2302.06763*, 2023.

- 336 [18] Liam Madden, Emiliano Dall’Anese, and Stephen Becker. High probability convergence  
337 and uniform stability bounds for nonconvex stochastic gradient descent. *arXiv preprint*  
338 *arXiv:2006.05610*, 2020.
- 339 [19] Eric Moulines and Francis Bach. Non-asymptotic analysis of stochastic approximation  
340 algorithms for machine learning. *Advances in neural information processing systems*, 24,  
341 2011.
- 342 [20] Alexander V Nazin, Arkadi S Nemirovsky, Alexandre B Tsybakov, and Anatoli B Juditsky.  
343 Algorithms of robust stochastic optimization based on mirror descent method. *Automation and*  
344 *Remote Control*, 80(9):1607–1627, 2019.
- 345 [21] Arkadi Nemirovski, Anatoli Juditsky, Guanghui Lan, and Alexander Shapiro. Robust stochastic  
346 approximation approach to stochastic programming. *SIAM Journal on optimization*, 19(4):1574–  
347 1609, 2009.
- 348 [22] Ta Duy Nguyen, Thien Hang Nguyen, Alina Ene, and Huy Le Nguyen. High probability  
349 convergence of clipped-sgd under heavy-tailed noise. *arXiv preprint arXiv:2302.05437*, 2023.
- 350 [23] Alexander Rakhlin, Ohad Shamir, and Karthik Sridharan. Making gradient descent optimal for  
351 strongly convex stochastic optimization. *arXiv preprint arXiv:1109.5647*, 2011.
- 352 [24] Abdurakhmon Sadiev, Marina Danilova, Eduard Gorbunov, Samuel Horváth, Gauthier Gidel,  
353 Pavel Dvurechensky, Alexander Gasnikov, and Peter Richtárik. High-probability bounds for  
354 stochastic optimization and variational inequalities: the case of unbounded variance. *arXiv*  
355 *preprint arXiv:2302.00999*, 2023.
- 356 [25] Matan Schliserman and Tomer Koren. Stability vs implicit bias of gradient methods on separable  
357 data and beyond. In *Conference on Learning Theory*, pages 3380–3394. PMLR, 2022.
- 358 [26] Matan Schliserman and Tomer Koren. Tight risk bounds for gradient descent on separable data.  
359 *arXiv preprint arXiv:2303.01135*, 2023.
- 360 [27] Ohad Shamir. Gradient methods never overfit on separable data. *The Journal of Machine*  
361 *Learning Research*, 22(1):3847–3866, 2021.
- 362 [28] Daniel Soudry, Elad Hoffer, Mor Shpigel Nacson, Suriya Gunasekar, and Nathan Srebro. The  
363 implicit bias of gradient descent on separable data. *The Journal of Machine Learning Research*,  
364 19(1):2822–2878, 2018.
- 365 [29] Matus Telgarsky. Margins, shrinkage, and boosting. In *International Conference on Machine*  
366 *Learning*, pages 307–315. PMLR, 2013.
- 367 [30] Matus Telgarsky. Stochastic linear optimization never overfits with quadratically-bounded  
368 losses on general data. In *Conference on Learning Theory*, pages 5453–5488. PMLR, 2022.
- 369 [31] Joel Tropp. Freedman’s inequality for matrix martingales. 2011.
- 370 [32] Roman Vershynin. *High-dimensional probability: An introduction with applications in data*  
371 *science*, volume 47. Cambridge university press, 2018.

## 372 A Concentration Inequalities

373 **Lemma 14.** *Let  $X$  be a random variable such that  $\mathbb{E}[X] = 0$  and  $|X| \leq R$  almost surely. Then for*  
 374  $0 \leq \lambda \leq \frac{1}{R}$

$$\mathbb{E}[\exp(\lambda X)] \leq \exp\left(\frac{3}{4}\lambda^2\mathbb{E}[X^2]\right).$$

375 The following lemma is similar to Lemma 2.2 in [16].

376 **Lemma 15.** *Suppose that  $Q$  satisfies for all  $0 \leq \lambda \leq \frac{1}{\sigma}$ ,  $\mathbb{E}[\exp(\lambda^2 Q^2)] \leq \exp(\lambda^2 \sigma^2)$ . Then for*  
 377 *variable  $X$  such that  $\mathbb{E}[X] = 0$  and  $|X| \leq a(Q + b)$  for some  $a \geq 0$  then for all  $\lambda \geq 0$*

$$\mathbb{E}[\exp(\lambda X)] \leq \exp(2\lambda^2 a^2 (\sigma^2 + b^2)).$$

378 *In particular, if  $b = 0$  we can have a tighter constant:  $\mathbb{E}[\exp(\lambda X)] \leq \exp(\lambda^2 a^2 \sigma^2)$ .*

379 *Proof.* We consider  $\mathbb{E}[\exp(\lambda X)]$

380 If  $0 \leq \lambda \leq \frac{1}{\sqrt{2}a\sigma}$  then using  $\exp(x) \leq x + \exp(x^2)$

$$\begin{aligned} \mathbb{E}[\exp(\lambda X)] &\leq \mathbb{E}[\exp(\lambda^2 X^2)] \\ &\leq \mathbb{E}\left[\exp\left(\lambda^2 a^2 (Q + b)^2\right)\right] \\ &\leq \mathbb{E}\left[\exp\left(2\lambda^2 a^2 Q^2 + 2\lambda^2 a^2 b^2\right)\right] \\ &\leq \exp(2\lambda^2 a^2 b^2) \mathbb{E}[\exp(2\lambda^2 a^2 Q^2)] \\ &\leq \exp(2\lambda^2 a^2 (\sigma^2 + b^2)) \end{aligned}$$

381 Otherwise  $\frac{1}{\sigma} \leq \lambda \sqrt{2}a$

$$\begin{aligned} \mathbb{E}[\exp(\lambda X)] &\leq \mathbb{E}\left[\exp\left(\lambda^2 a^2 \sigma^2 + \frac{X^2}{4a^2 \sigma^2}\right)\right] \\ &\leq \exp(\lambda^2 a^2 \sigma^2) \mathbb{E}\left[\exp\left(\frac{(Q + b)^2}{4\sigma^2}\right)\right] \\ &\leq \exp(\lambda^2 a^2 \sigma^2) \mathbb{E}\left[\exp\left(\frac{Q^2 + b^2}{2\sigma^2}\right)\right] \\ &\leq \exp(\lambda^2 a^2 \sigma^2) \exp\left(\frac{b^2}{2\sigma^2}\right) \exp\left(\frac{1}{2}\right) \\ &\leq \exp(\lambda^2 a^2 \sigma^2) \exp(\lambda^2 a^2 b^2) \exp(\lambda^2 a^2 \sigma^2) \\ &\leq \exp(2\lambda^2 a^2 (\sigma^2 + b^2)). \end{aligned}$$

382

□

383 **Theorem 16** (Freedman's inequality [2, 31]). *Let  $(X_t)_{t \geq 1}$  be a martingale difference sequence.*  
 384 *Assume that there exists a constant  $c$  such that  $|X_t| \leq c$  almost surely for all  $t \geq 1$  and define*  
 385  $\sigma_t^2 = \mathbb{E}[X_t^2 \mid X_{t-1}, \dots, X_1]$ . *Then for all  $b > 0$ ,  $F > 0$  and  $T \geq 1$*

$$\Pr\left[\exists T \geq 1 : \left|\sum_{t=1}^T X_t\right| > b \text{ and } \sum_{t=1}^T \sigma_t^2 \leq F\right] \leq 2 \exp\left(-\frac{b^2}{2F + 2cb/3}\right).$$

## 386 B Missing Proofs

387 *Proof of Lemma 2.* Using the optimality condition

$$\langle \eta g_{t+1} + \nabla \psi(w_{t+1}) - \nabla \psi(w_t), w_{\text{ref}} - w_{t+1} \rangle \geq 0$$

388 we have

$$\begin{aligned}
\langle \eta g_{t+1}, w_t - w_{\text{ref}} \rangle &= \langle \eta g_{t+1}, w_{t+1} - w_{\text{ref}} \rangle + \langle \eta g_{t+1}, w_t - w_{t+1} \rangle \\
&\leq \langle \nabla \psi(w_{t+1}) - \nabla \psi(w_t), w_{\text{ref}} - w_{t+1} \rangle + \langle \eta g_{t+1}, w_t - w_{t+1} \rangle \\
&= \mathbf{D}_\psi(w_{\text{ref}}; w_t) - \mathbf{D}_\psi(w_{\text{ref}}; w_{t+1}) - \mathbf{D}_\psi(w_{t+1}; w_t) + \langle \eta g_{t+1}, w_t - w_{t+1} \rangle \\
&\leq \mathbf{D}_\psi(w_{\text{ref}}; w_t) - \mathbf{D}_\psi(w_{\text{ref}}; w_{t+1}) - \frac{1}{2} \|w_t - w_{t+1}\|^2 + \langle \eta g_{t+1}, w_t - w_{t+1} \rangle \\
&\leq \mathbf{D}_\psi(w_{\text{ref}}; w_t) - \mathbf{D}_\psi(w_{\text{ref}}; w_{t+1}) + \frac{\eta^2}{2} \|g_{t+1}\|_*^2
\end{aligned}$$

389 Hence

$$\begin{aligned}
\mathbf{D}_\psi(w_{\text{ref}}; w_{t+1}) - \mathbf{D}_\psi(w_{\text{ref}}; w_t) &\leq \langle \eta g_{t+1}, w_{\text{ref}} - w_t \rangle + \frac{\eta^2}{2} \|g_{t+1}\|_*^2 \\
&\leq \eta (\ell_{t+1}(w_{\text{ref}}) - \ell_{t+1}(w_t)) + \frac{\eta^2}{2} \|g_{t+1}\|_*^2
\end{aligned}$$

390 as needed.  $\square$

391 *Proof of Lemma 4.* We have

$$\begin{aligned}
\mathbf{D}_\psi(w_{\text{ref}}; w_{t+1}) - \mathbf{D}_\psi(w_{\text{ref}}; w_t) &\leq \eta (\ell_{t+1}(w_{\text{ref}}) - \ell_{t+1}(w_t)) + \frac{\eta^2}{2} \|g_{t+1}\|_*^2 \\
&\leq \eta (\ell_{t+1}(w_{\text{ref}}) - \ell_{t+1}(w_t)) + \frac{\eta^2}{2} \ell'_{t+1}(w_t)^2 \\
&\leq \eta (\ell_{t+1}(w_{\text{ref}}) - \ell_{t+1}(w_t)) + \eta^2 \rho \ell_{t+1}(w_t) \\
&= \eta \ell_{t+1}(w_{\text{ref}}) - \frac{\eta}{2} \ell_{t+1}(w_t) \leq \eta \ell_{t+1}(w_{\text{ref}}).
\end{aligned}$$

392 Summing up, we have, for any  $0 \leq t \leq T$

$$\mathbf{D}_\psi(w_{\text{ref}}; w_t) \leq \mathbf{D}_\psi(w_{\text{ref}}; w_0) + \eta \sum_{i=1}^t \ell_i(w_{\text{ref}}) = D_0 + \eta \sum_{i=1}^t \ell_i(w_{\text{ref}}).$$

393  $\square$

394 *Proof of Lemma 5.* We have  $|\ell_i(w_{\text{ref}}) - \mathcal{R}(w_{\text{ref}})| \leq \max\{\ell_i(w_{\text{ref}}), \mathcal{R}(w_{\text{ref}})\} \leq C_3$  thus by  
395 lemma 14, for  $\lambda \leq \frac{1}{C_3}$

$$\begin{aligned}
&\mathbb{E}[\exp(\lambda (\ell_i(w_{\text{ref}}) - \mathcal{R}(w_{\text{ref}})))] \\
&\leq \exp\left(\frac{3}{4} \lambda^2 \mathbb{E}[(\ell_i(w_{\text{ref}}) - \mathcal{R}(w_{\text{ref}}))^2]\right) \\
&\stackrel{(a)}{\leq} \exp\left(\frac{3}{4} \lambda^2 \mathbb{E}[\ell_i(w_{\text{ref}})^2]\right) \\
&\stackrel{(b)}{\leq} \exp\left(\frac{3}{4} \lambda^2 C_3 \mathcal{R}(w_{\text{ref}})\right) \leq \exp\left(\frac{3}{4} \lambda \mathcal{R}(w_{\text{ref}})\right),
\end{aligned}$$

396 where for (a) we use  $\mathbb{E}[(X - \mathbb{E}[X])^2] \leq \mathbb{E}[X^2]$  and for (b) we use  $\ell_i(w_{\text{ref}}) \leq C_3$ . Since  $\ell_i(w_{\text{ref}})$   
397 are independent random variables, we have

$$\begin{aligned}
&\mathbb{E}\left[\exp\left(\lambda \sum_{i=1}^T (\ell_i(w_{\text{ref}}) - \mathcal{R}(w_{\text{ref}}))\right)\right] = \mathbb{E}\left[\prod_{i=1}^T \exp(\lambda (\ell_i(w_{\text{ref}}) - \mathcal{R}(w_{\text{ref}})))\right] \\
&= \prod_{i=1}^T \mathbb{E}[\exp(\lambda (\ell_i(w_{\text{ref}}) - \mathcal{R}(w_{\text{ref}})))] \leq \prod_{i=1}^T \exp\left(\frac{3}{4} \lambda \mathcal{R}(w_{\text{ref}})\right) = \exp\left(\frac{3}{4} \lambda T \mathcal{R}(w_{\text{ref}})\right).
\end{aligned}$$

398 Hence by Markov's inequality

$$\begin{aligned} & \Pr \left[ \lambda \sum_{i=1}^T (\ell_i(w_{\text{ref}}) - \mathcal{R}(w_{\text{ref}})) \geq \frac{3}{4} \lambda T \mathcal{R}(w_{\text{ref}}) + \log \frac{1}{\delta} \right] \\ &= \Pr \left[ \exp \left( \lambda \sum_{i=1}^T (\ell_i(w_{\text{ref}}) - \mathcal{R}(w_{\text{ref}})) \right) \geq \frac{1}{\delta} \exp \left( \frac{3}{4} \lambda T \mathcal{R}(w_{\text{ref}}) \right) \right] \\ &\leq \frac{\mathbb{E} \left[ \exp \left( \lambda \sum_{i=1}^T (\ell_i(w_{\text{ref}}) - \mathcal{R}(w_{\text{ref}})) \right) \right]}{\frac{1}{\delta} \exp \left( \frac{3}{4} \lambda T \mathcal{R}(w_{\text{ref}}) \right)} \leq \delta \end{aligned}$$

399 Choose  $\lambda = \frac{1}{C_3}$  we have with probability at least  $1 - \delta$

$$\sum_{i=1}^T (\ell_i(w_{\text{ref}}) - \mathcal{R}(w_{\text{ref}})) \leq \frac{3}{4} T \mathcal{R}(w_{\text{ref}}) + C_3 \log \frac{1}{\delta}.$$

400

□

401 *Proof of Theorem 3.* Towards bounding the risk  $\sum_{t=0}^k \mathcal{R}(w_t)$ , we define random variables

$$\begin{aligned} Z_t &= \frac{1}{2} z_t \eta (\mathcal{R}(w_t) - \mathcal{R}(w_{\text{ref}}) - \ell_{t+1}(w_{\text{ref}})) + z_t (\mathbf{D}_\psi(w_{\text{ref}}; w_{t+1}) - \mathbf{D}_\psi(w_{\text{ref}}; w_t)) \\ &\quad - \frac{3}{16} z_t \eta (\mathcal{R}(w_{\text{ref}}) + \mathcal{R}(w_t)); \quad \forall 0 \leq t \leq T-1 \end{aligned}$$

$$\text{where } z_t = \frac{1}{\eta C_4 \sqrt{2\eta\gamma C_3 + 2D_0 + 2\eta \sum_{i=1}^t \ell_i(w_{\text{ref}})}}; \quad \gamma = \max \left\{ 1, \log \frac{1}{\delta} \right\}$$

$$\text{and } S_t = \sum_{i=0}^t Z_i; \quad \forall 0 \leq t \leq T-1$$

402 The reason to define these variables is because from Lemma 4, we can bound

$$\begin{aligned} & \mathbb{E} [\exp(Z_t) \mid \mathcal{F}_t] \times \exp \left( \frac{3}{16} z_t \eta (\mathcal{R}(w_{\text{ref}}) + \mathcal{R}(w_t)) \right) \\ &\leq \mathbb{E} \left[ \exp \left( \frac{1}{2} z_t \eta (\mathcal{R}(w_t) - \mathcal{R}(w_{\text{ref}}) - \ell_{t+1}(w_{\text{ref}})) + z_t \left( \eta \ell_{t+1}(w_{\text{ref}}) - \frac{\eta}{2} \ell_{t+1}(w_t) \right) \right) \mid \mathcal{F}_t \right] \\ &= \mathbb{E} \left[ \exp \left( \frac{1}{2} z_t \eta (\mathcal{R}(w_t) - \mathcal{R}(w_{\text{ref}}) + \ell_{t+1}(w_{\text{ref}}) - \ell_{t+1}(w_t)) \right) \mid \mathcal{F}_t \right] \end{aligned}$$

403 where now inside the expectation, we have the term  $\mathcal{R}(w_t) - \mathcal{R}(w_{\text{ref}}) + \ell_{t+1}(w_{\text{ref}}) - \ell_{t+1}(w_t)$   
404 which has expectation 0. This reminds us of Lemma 14. To use this lemma, we notice that, by the  
405 assumption that the samples are IID with  $\max \{\|x\|_*, |y|\} \leq 1$  and Lemma 1,

$$|\ell_{x,y}(w_{\text{ref}}) - \ell_{x,y}(w_t)| \leq \|w_{\text{ref}} - w_t\| \underbrace{(C_1 + C_2(1 + \|w_{\text{ref}}\|))}_{C_4}$$

406 We also have

$$|\mathcal{R}(w_t) - \mathcal{R}(w_{\text{ref}})| = |\mathbb{E} [\ell_{x,y}(w_{\text{ref}}) - \ell_{x,y}(w_t)]| \leq C_4 \|w_{\text{ref}} - w_t\|$$

407 Therefore

$$\left| \frac{\eta}{2} (\mathcal{R}(w_t) - \mathcal{R}(w_{\text{ref}}) + \ell_{t+1}(w_{\text{ref}}) - \ell_{t+1}(w_t)) \right| \leq \eta C_4 \|w_{\text{ref}} - w_t\|$$

408 By the choice of  $z_t$  we have

$$z_t \leq \frac{1}{\eta C_4 \sqrt{2\eta C_3 + 2D_0 + 2\eta \sum_{i=1}^t \ell_i(w_{\text{ref}})}} \leq \frac{1}{\eta C_4 \sqrt{2\mathbf{D}_\psi(w_{\text{ref}}; w_t)}} \leq \frac{1}{\eta C_4 \|w_{\text{ref}} - w_t\|}$$

409 Now we can apply Lemma 14 to bound

$$\begin{aligned}
& \mathbb{E} [\exp(Z_t) \mid \mathcal{F}_t] \times \exp\left(\frac{3}{16} z_t \eta (\mathcal{R}(w_{\text{ref}}) + \mathcal{R}(w_t))\right) \\
& \leq \exp\left(\frac{3}{4} \frac{1}{4} z_t^2 \eta^2 \mathbb{E} \left[ (\mathcal{R}(w_t) - \mathcal{R}(w_{\text{ref}}) + \ell_{t+1}(w_{\text{ref}}) - \ell_{t+1}(w_t))^2 \mid \mathcal{F}_t \right]\right) \\
& \leq \exp\left(\frac{3}{16} z_t^2 \eta^2 \mathbb{E} \left[ (\ell_{t+1}(w_{\text{ref}}) - \ell_{t+1}(w_t))^2 \mid \mathcal{F}_t \right]\right) \\
& \leq \exp\left(\frac{3}{16} z_t^2 \eta^2 C_4 \|w_{\text{ref}} - w_t\| \mathbb{E} [\ell_{t+1}(w_{\text{ref}}) + \ell_{t+1}(w_t) \mid \mathcal{F}_t]\right) \\
& \leq \exp\left(\frac{3}{16} z_t \eta (\mathcal{R}(w_{\text{ref}}) + \mathcal{R}(w_t))\right)
\end{aligned}$$

410 Therefore  $\mathbb{E} [\exp(Z_t) \mid \mathcal{F}_t] \leq 1$  and hence  $(\exp(S_t))_{t \geq 0}$  is a supermartingale. By Ville's inequality,  
411 we have with probability at least  $1 - \delta$ , for all  $0 \leq k \leq T - 1$

$$\sum_{t=0}^k Z_t \leq \log \frac{1}{\delta}$$

412 Expanding this inequality, we obtain

$$\begin{aligned}
& \sum_{t=0}^k \frac{5}{16} z_t \eta \mathcal{R}(w_t) + z_k \mathbf{D}_\psi(w_{\text{ref}}; w_{k+1}) \\
& \leq \log \frac{1}{\delta} + z_0 \mathbf{D}_\psi(w_{\text{ref}}; w_0) + \frac{11}{16} \eta \mathcal{R}(w_{\text{ref}}) \sum_{t=0}^k z_t + \frac{1}{2} \sum_{t=0}^k z_t \eta \ell_{t+1}(w_{\text{ref}}) + \sum_{t=1}^k \underbrace{(z_t - z_{t-1})}_{\leq 0} \mathbf{D}_\psi(w_{\text{ref}}; w_t) \\
& \stackrel{(a)}{\leq} \log \frac{1}{\delta} + z_0 D_0 + \frac{11}{16} \eta \mathcal{R}(w_{\text{ref}}) (k+1) z_0 + \frac{1}{2} \sum_{t=0}^k \frac{\eta \ell_{t+1}(w_{\text{ref}})}{\eta C_4 \sqrt{2\eta C_3 + 2D_0 + 2\eta \sum_{i=1}^t \ell_i(w_{\text{ref}})}} \\
& \stackrel{(b)}{\leq} \log \frac{1}{\delta} + z_0 D_0 + \frac{11}{16} \eta \mathcal{R}(w_{\text{ref}}) (k+1) z_0 + \frac{1}{2\eta C_4} \sum_{t=0}^k \frac{\eta \ell_{t+1}(w_{\text{ref}})}{\sqrt{2D_0 + 2\eta \sum_{i=1}^{t+1} \ell_i(w_{\text{ref}})}} \tag{1}
\end{aligned}$$

413 For (a) we use the fact that  $(z_t)$  is a decreasing sequence and  $\mathcal{R}(w_{\text{ref}}) \leq \frac{\rho D_0}{T}$ . For (b) we  
414 use the assumption  $\ell_{t+1}(w_{\text{ref}}) \leq C_3$ . Now notice that we can write  $\frac{\eta \ell_{t+1}(w_{\text{ref}})}{\sqrt{2D_0 + 2\eta \sum_{i=1}^{t+1} \ell_i(w_{\text{ref}})}} \leq$   
415  $\sqrt{2D_0 + 2\eta \sum_{i=1}^{t+1} \ell_i(w_{\text{ref}})} - \sqrt{2D_0 + 2\eta \sum_{i=1}^t \ell_i(w_{\text{ref}})}$  and sum over  $t$  we obtain

$$\frac{5}{16} z_k \eta \sum_{t=0}^k \mathcal{R}(w_t) + z_k \mathbf{D}_\psi(w_{\text{ref}}; w_{k+1}) \leq \log \frac{1}{\delta} + \frac{11(k+1)\mathcal{R}(w_{\text{ref}})}{16C_4 \sqrt{2\eta \gamma C_3 + 2D_0}} + \frac{1}{\sqrt{2\eta C_4}} \sqrt{D_0 + \eta \sum_{i=1}^{k+1} \ell_i(w_{\text{ref}})}$$

416 Hence

$$\begin{aligned}
& \sum_{t=0}^k \mathcal{R}(w_t) + \frac{16}{5\eta} \mathbf{D}_\psi(w_{\text{ref}}; w_{k+1}) \\
& \leq \frac{16C_4}{5} \left( \log \frac{1}{\delta} + \frac{11(k+1)\mathcal{R}(w_{\text{ref}})}{16C_4 \sqrt{2\eta \gamma C_3 + 2D_0}} + \frac{1}{\sqrt{2\eta C_4}} \sqrt{D_0 + \eta \sum_{i=1}^T \ell_i(w_{\text{ref}})} \right) \sqrt{2\eta \gamma C_3 + 2D_0 + 2\eta \sum_{i=1}^T \ell_i(w_{\text{ref}})}
\end{aligned}$$

417 By Lemma 5, with probability at least  $1 - \delta$  we have

$$\sum_{i=1}^T \ell_i(w_{\text{ref}}) \leq \frac{7}{4} T \mathcal{R}(w_{\text{ref}}) + C_3 \log \frac{1}{\delta} \leq \frac{7}{4} \rho D_0 + C_3 \gamma$$

418 Therefore with probability at least  $1 - 2\delta$

$$\begin{aligned}
& \sum_{t=0}^k \mathcal{R}(w_t) + \frac{16}{5\eta} \mathbf{D}_\psi(w_{\text{ref}}; w_{k+1}) \\
& \leq \left( \frac{16C_4}{5} \log \frac{1}{\delta} + \frac{11(k+1)}{5\sqrt{2\eta\gamma C_3 + 2D_0}} \mathcal{R}(w_{\text{ref}}) + \frac{8}{5\eta} \sqrt{\frac{15}{4} D_0 + 2\eta\gamma C_3} \right) \sqrt{\frac{15}{4} D_0 + 4\eta\gamma C_3} \\
& \leq \frac{16C_4}{5} \log \frac{1}{\delta} \sqrt{\frac{15}{4} D_0 + 4\eta\gamma C_3} + \left( \frac{6}{\eta} D_0 + \frac{32}{5} \gamma C_3 \right) + 3(k+1) \mathcal{R}(w_{\text{ref}}).
\end{aligned}$$

419 which gives us the conclusion.  $\square$

420 *Proof of Theorem 10.* First we consider the bounded domain case. Let

$$v_t = \arg \min_{\|w - w_{\text{ref}}\| \leq R} \{ \langle \eta_t g_t(v_{t-1}), w \rangle + \mathbf{D}_\psi(w; v_{t-1}) \}$$

421 where we use  $g_t(v_{t-1})$  to denote the gradient at  $v_{t-1}$  using the same data point  $(x_t, y_t)$  when  
 422 computing  $w_t$  and we choose

$$R = \max \left\{ \sqrt{6 \left( D_0 + \eta^2 C_4^2 \left( T\mu_2 + 2M\sqrt{T} \left( \frac{2}{\delta} \right)^{\frac{1}{p}} \right) \right)}, 6 \left( \frac{2}{3} \gamma \left( 7 \left( \frac{MT}{\delta} \right)^{1/2p} + 2\mu_1 \right) + \sqrt{\log \frac{2}{\delta} T\mu_2} \right) \eta C_4 \right\}$$

423 We have

$$\begin{aligned}
& |(\mathcal{R}(v_t) - \mathcal{R}(w_{\text{ref}}) + \ell_{t+1}(w_{\text{ref}}) - \ell_{t+1}(v_t))| \\
& \leq |\ell_{t+1}(w_{\text{ref}}) - \ell_{t+1}(v_t)| + |\mathcal{R}(v_t) - \mathcal{R}(w_{\text{ref}})| \\
& \leq (Q_t + \mu_1) \|w_{\text{ref}} - v_t\| C_4 \leq (Q_t + \mu_1) RC_4
\end{aligned} \tag{2}$$

424 Let us define the following variables

$$\begin{aligned}
U_t &= (\mathcal{R}(v_t) - \mathcal{R}(w_{\text{ref}}) + \ell_{t+1}(w_{\text{ref}}) - \ell_{t+1}(v_t)) \\
P_t &= \begin{cases} U_t & \text{if } |U_t| \leq (A + 2\mu_1) RC_4 \\ (A + 2\mu_1) RC_4 \text{sign}(U_t) & \text{otherwise} \end{cases} \\
& \text{where } A = \left( \frac{MT}{\delta} \right)^{1/2p} \text{ and } B_t = U_t - P_t.
\end{aligned}$$

425 In words,  $U_t$  is the variable of our interest and  $P_t$  is the truncated version of  $U_t$  and  $B_t$  is the bias.

426 We would want to control these terms in order to bound  $\sum_{t=0}^k U_t$ . We start with the following  
 427 decomposition

$$\sum_{t=0}^k U_t = \sum_{t=0}^k (P_t - \mathbb{E}[P_t | \mathcal{F}_t]) + \sum_{t=0}^k \mathbb{E}[P_t | \mathcal{F}_t] + \sum_{t=0}^k B_t$$

428 First, we consider the term  $\sum_{t=0}^k \mathbb{E}[P_t | \mathcal{F}_t]$ .

$$\begin{aligned}
& \mathbb{E}[P_t | \mathcal{F}_t] = \mathbb{E}[P_t - U_t | \mathcal{F}_t] \leq \mathbb{E}[|P_t - U_t| | \mathcal{F}_t] \\
& = \mathbb{E} \left[ |P_t - U_t| \left( \mathbf{1}[|U_t| \leq (A + 2\mu_1) RC_4] + \sum_{k=2}^{\infty} \mathbf{1}[(k-1)ARC_4 + 2\mu_1 RC_4 \leq |U_t| \leq kARC_4 + 2\mu_1 RC_4] \right) \right] \\
& = \mathbb{E} \left[ \sum_{k=2}^{\infty} |P_t - U_t| \mathbf{1}[(k-1)ARC_4 + 2\mu_1 RC_4 \leq |U_t| \leq kARC_4 + 2\mu_1 RC_4] \right] \\
& \leq \sum_{k=2}^{\infty} (kARC_4 + 2\mu_1 RC_4 - (A + 2\mu_1) RC_4) RC_4 \mathbb{E}[\mathbf{1}[|U_t| \geq (k-1)ARC_4 + 2\mu_1 RC_4]]
\end{aligned}$$

$$\begin{aligned}
&\leq \sum_{k=1}^{\infty} kARC_4 \mathbb{E} [\mathbf{1} [(Q_t + \mu_1) RC_4 \geq kARC_4 + 2\mu_1 RC_4]] \quad (\text{due to 2}) \\
&= \sum_{k=1}^{\infty} kARC_4 \Pr [Q_t \geq kA + \mu_1] \leq ARC_4 \sum_{k=1}^{\infty} k \Pr [|Q_t - \mu_1|^{2p} \geq (kA)^{2p}] \\
&\leq ARC_4 \sum_{k=1}^{\infty} \frac{Mk}{k^{2p}A^{2p}} = A^{1-2p} RC_4 M \sum_{k=1}^{\infty} k^{1-2p} \leq 2A^{1-2p} RC_4 M
\end{aligned}$$

where the last inequality is because  $p \geq 2$ . We obtain

$$\sum_{t=0}^k \mathbb{E} [P_t | \mathcal{F}_t] \leq 2A^{1-2p} RC_4 MT$$

The term  $\sum_{t=0}^k B_t \leq \sum_{t=0}^k |B_t| \leq \sum_{t=0}^{T-1} |B_t|$  will be bounded by Markov inequality. From the above deduction,

$$\mathbb{E} \left[ \sum_{t=0}^{T-1} |B_t| \right] = \sum_{t=0}^{T-1} \mathbb{E} [|B_t|] = \sum_{t=0}^{T-1} \mathbb{E} [\mathbb{E} [|U_t - P_t| | \mathcal{F}_t]] \leq 2A^{1-2p} RC_4 MT$$

With probability at least  $1 - \delta$ ,

$$\sum_{t=0}^{T-1} |B_t| \leq 2TA^{1-2p} RC_4 M \frac{1}{\delta} = 2RC_4 A^{1-2p} \left( \frac{MT}{\delta} \right)$$

Finally, we will use Freedman's inequality to bound the remaining term  $\sum_{t=0}^k (P_t - \mathbb{E} [P_t | \mathcal{F}_t])$ . First, notice that

$$\begin{aligned}
&\mathbb{E} [|P_t - \mathbb{E} [P_t | \mathcal{F}_t]|^2 | \mathcal{F}_t] \leq \mathbb{E} [P_t^2 | \mathcal{F}_t] \\
&\leq \mathbb{E} [U_t^2 | \mathcal{F}_t] \leq \mathbb{E} [(\ell_{t+1}(w_{\text{ref}}) - \ell_{t+1}(v_t))^2 | \mathcal{F}_t] \\
&\leq R^2 C_4^2 \mathbb{E} [Q_t^2] \leq R^2 C_4^2 \mu_2.
\end{aligned}$$

We have  $(P_t - \mathbb{E} [P_t | \mathcal{F}_t])$  is a martingale difference sequence with  $|P_t - \mathbb{E} [P_t | \mathcal{F}_t]| \leq 2(A + 2\mu_1) RC_4$ . We can apply Freedman's inequality,

$$\begin{aligned}
&\Pr \left[ \exists k \geq 0 : \left| \sum_{t=0}^k P_t - \mathbb{E} [P_t | \mathcal{F}_t] \right| > a \text{ and } \sum_{t=0}^k \mathbb{E} [|P_t - \mathbb{E} [P_t | \mathcal{F}_t]|^2 | \mathcal{F}_t] \leq F \right] \\
&\leq 2 \exp \left( \frac{-2a^2}{2F + 4(A + 2\mu_1) RC_4 a / 3} \right)
\end{aligned}$$

If we select

$$\begin{aligned}
F &= T\mu_2 R^2 C_4^2 \\
\text{and } a &= \frac{2}{3} \log \frac{2}{\delta} (A + 2\mu_1) RC_4 + RC_4 \sqrt{\log \frac{2}{\delta} T\mu_2}
\end{aligned}$$

we obtain with probability at least  $1 - \delta$ , for all  $k \geq 0$

$$\sum_{t=0}^k P_t - \mathbb{E} [P_t | \mathcal{F}_t] \leq \frac{2}{3} \log \frac{2}{\delta} (A + 2\mu_1) RC_4 + RC_4 \sqrt{\log \frac{2}{\delta} T\mu_2}$$

Therefore with probability at least  $1 - 3\delta$  we have the following event  $E$  : for all  $k \geq 0$

$$\begin{aligned}
\sum_{t=0}^k U_t &\leq \frac{2}{3} \log \frac{2}{\delta} (A + 2\mu_1) RC_4 + RC_4 \sqrt{\log \frac{2}{\delta} T\mu_2} + 4RC_4 A^{1-2p} \left( \frac{MT}{\delta} \right) \\
&\leq \frac{2}{3} \gamma \left( 7 \left( \frac{MT}{\delta} \right)^{1/2p} + 2\mu_1 \right) RC_4 + RC_4 \sqrt{\log \frac{2}{\delta} T\mu_2}
\end{aligned}$$

$$\text{and } \sum_{t=1}^{k+1} Q_t^2 \leq T\mu_2 + 2M\sqrt{T} \left(\frac{2}{\delta}\right)^{\frac{1}{p}}.$$

440 where we denote  $\gamma = \max \{1, \log \frac{2}{\delta}\}$ . Furthermore

$$\begin{aligned} \frac{\eta^2}{2} \sum_{t=0}^k \|g_{t+1}(v_t)\|_*^2 &\leq \frac{\eta^2}{2} \sum_{t=0}^k Q_{t+1}^2 (C_1 + C_2 (1 + \|v_t\|))^2 \\ &\leq \frac{\eta^2}{2} \sum_{t=0}^k Q_{t+1}^2 (C_4 + C_2 \|v_t - w_{\text{ref}}\|)^2 \\ &\leq \eta^2 C_4^2 \sum_{t=1}^{k+1} Q_t^2 + \eta^2 C_2^2 \sum_{t=0}^k Q_{t+1}^2 \|v_t - w_{\text{ref}}\|^2 \\ &\leq \eta^2 (C_4^2 + C_2^2 R^2) \left( T\mu_2 + 2M\sqrt{T} \left(\frac{2}{\delta}\right)^{\frac{1}{p}} \right) \end{aligned}$$

441 Now we will proceed by induction to show that conditioned on the event  $E$ ,  $w_t = v_t$ . For the base  
442 case, we have  $w_0 = v_0$ . Suppose that we have  $w_t = v_t$  for all  $t \leq k$ . We will show that  $w_{k+1} = v_{k+1}$ .  
443 From Lemma 2, we have

$$\begin{aligned} &\sum_{t=0}^k \eta (\mathcal{R}(w_t) - \mathcal{R}^*) + \mathbf{D}_\psi(w_{\text{ref}}; w_{k+1}) \\ &\leq D_0 + \sum_{t=0}^k \eta (\mathcal{R}(w_{\text{ref}}) - \mathcal{R}^*) + \eta \sum_{t=0}^k (\mathcal{R}(w_t) - \mathcal{R}(w_{\text{ref}}) + \ell_{t+1}(w_{\text{ref}}) - \ell_{t+1}(w_t)) + \frac{\eta^2}{2} \sum_{t=0}^k \|g_{t+1}\|_*^2 \\ &\leq D_0 + \eta\sqrt{T}D_0 + \eta \sum_{t=0}^k U_t + \frac{\eta^2}{2} \sum_{t=0}^k \|g_{t+1}(v_t)\|_*^2 \\ &\leq D_0 (1 + \eta\sqrt{T}) \\ &\quad + \left( \frac{2}{3} \gamma \left( 7 \left( \frac{MT}{\delta} \right)^{1/2p} + 2\mu_1 \right) + \sqrt{\log \frac{2}{\delta} T\mu_2} \right) \eta RC_4 + \eta^2 (C_4^2 + C_2^2 R^2) \left( T\mu_2 + 2M\sqrt{T} \left(\frac{2}{\delta}\right)^{\frac{1}{p}} \right) \\ &\leq \frac{R^2}{2} \end{aligned}$$

444 Thus  $\|w_{k+1} - w_{\text{ref}}\| \leq R$ . And thus  $w_{k+1} = v_{k+1}$ . Finally, we can conclude that with probability  
445 at least  $1 - 3\delta$ , for all  $0 \leq k \leq T - 1$

$$\frac{1}{k+1} \sum_{t=0}^k (\mathcal{R}(w_t) - \mathcal{R}(w_{\text{ref}})) + \frac{\mathbf{D}_\psi(w_{\text{ref}}; w_{k+1})}{\eta(k+1)} \leq \frac{R^2}{2\eta(k+1)}.$$

446

□

447 *Proof of Theorem 13.* For  $0 \leq j \leq \tau - 1$ , we define

$$\begin{aligned} Z_i^j &= z_{\tau i+j} \eta (\mathbb{E} [\ell_{\tau(i+1)+j}(w_{\text{ref}}) \mid \mathcal{F}_{\tau i+j}] - \mathbb{E} [\ell_{\tau(i+1)+j}(w_{\tau i+j}) \mid \mathcal{F}_{\tau i+j}]) \\ &\quad + z_{\tau i+j} \eta (\ell_{\tau(i+1)+j}(w_{\text{ref}}) - \ell_{\tau(i+1)+j}(w_{\tau i+j})) - 8(z_{\tau i+j} \eta)^2 C_4^2 \mathbf{D}_\psi(w_{\text{ref}}; w_{\tau i+j}) \quad \forall 0 \leq i \leq \frac{T-1-j}{\tau} \\ S_k^j &= \sum_{i=0}^k Z_i^j \quad \forall 0 \leq k \leq \frac{T-1-j}{\tau} \end{aligned}$$

448 where

$$z_t = \frac{1}{8\eta^2 C_4^2 (T+1+t)} \quad \forall -1 \leq t \leq T-1$$

449 We bound

$$\begin{aligned} & \left| \mathbb{E} [\ell_{\tau(i+1)+j}(w_{\text{ref}}) \mid \mathcal{F}_{\tau i+j}] - \mathbb{E} [\ell_{\tau(i+1)+j}(w_{\tau i+j}) \mid \mathcal{F}_{\tau i+j}] + \ell_{\tau(i+1)+j}(w_{\text{ref}}) - \ell_{\tau(i+1)+j}(w_{\tau i+j}) \right| \\ & \leq 2C_4 \|w_{\text{ref}} - w_{\tau i+j}\| \end{aligned}$$

450 By Lemma 15

$$\begin{aligned} & \mathbb{E} \left[ \exp \left( Z_i^j \right) \mid \mathcal{F}_{\tau i+j} \right] \\ & = \exp \left( -8 (z_{\tau i+j} \eta)^2 C_4^2 \mathbf{D}_\psi(w_{\text{ref}}; w_{\tau i+j}) \right) \\ & \quad \times \mathbb{E} \left[ \exp \left( z_{\tau i+j} \eta \left( \mathbb{E} [\ell_{\tau(i+1)+j}(w_{\text{ref}}) \mid \mathcal{F}_{\tau i+j}] - \mathbb{E} [\ell_{\tau(i+1)+j}(w_{\tau i+j}) \mid \mathcal{F}_{\tau i+j}] \right. \right. \right. \\ & \quad \left. \left. \left. + \ell_{\tau(i+1)+j}(w_{\text{ref}}) - \ell_{\tau(i+1)+j}(w_{\tau i+j}) \right) \right) \mid \mathcal{F}_{\tau i+j} \right] \\ & \leq \exp \left( -8 (z_{\tau i+j} \eta)^2 C_4^2 \mathbf{D}_\psi(w_{\text{ref}}; w_{\tau i+j}) \right) \exp \left( 4 (z_{\tau i+j} \eta)^2 C_4^2 \|w_{\text{ref}} - w_{\tau i+j}\|^2 \right) \leq 1 \end{aligned}$$

451 Therefore  $\mathbb{E} \left[ \exp \left( Z_i^j \right) \mid \mathcal{F}_{\tau i+j} \right] \leq 1$  and hence  $\left( \exp \left( S_k^j \right) \right)_{k \geq 0}$  is a supermartingale. By Ville's  
452 inequality, we have with probability at least  $1 - \delta$ , for all  $0 \leq k \leq \kappa$

$$\sum_{i=0}^k Z_i^j \leq \log \frac{1}{\delta}$$

453 By union bound over  $j = 0, \dots, \tau - 1$ , and with probability at least  $1 - \tau \delta$  we have for all  
454  $0 \leq k \leq T - \tau - 1$

$$\begin{aligned} & \sum_{t=0}^k z_t \eta \left( \mathbb{E} [\ell_{t+\tau}(w_{\text{ref}}) \mid \mathcal{F}_t] - \mathbb{E} [\ell_{t+\tau}(w_t) \mid \mathcal{F}_t] + \ell_{t+\tau}(w_{\text{ref}}) - \ell_{t+\tau}(w_t) \right) \\ & \leq \sum_{t=0}^k 8 (z_t \eta)^2 C_4^2 \mathbf{D}_\psi(w_{\text{ref}}; w_t) + \tau \log \frac{1}{\delta} \end{aligned}$$

455 We will proceed to prove by induction that  $\mathbf{D}_\psi(w_{\text{ref}}; w_t) \leq \frac{1}{2} R^2$

456 For the base case  $t = 0$ , this holds trivially. Suppose that this is true for all  $0 \leq t \leq k$ , we now show  
457 for  $t = k + 1$ .

458 If  $k \leq \tau - 1$ ,

$$\begin{aligned} & \sum_{t=0}^k \eta (\mathcal{R}(w_t) - \mathcal{R}^*) + \mathbf{D}_\psi(w_{\text{ref}}; w_{k+1}) \\ & \leq D_0 + \sum_{t=0}^k \eta (\mathcal{R}(w_{\text{ref}}) - \mathcal{R}^*) + \sum_{t=0}^k \eta (\mathcal{R}(w_t) - \mathcal{R}(w_{\text{ref}}) + \ell_{t+1}(w_{\text{ref}}) - \ell_{t+1}(w_t)) + \frac{\eta^2}{2} \sum_{t=0}^k \|g_{t+1}\|_*^2 \end{aligned}$$

459 We have

$$\sum_{t=0}^k \eta |\mathcal{R}(w_t) - \mathcal{R}(w_{\text{ref}}) + \ell_{t+1}(w_{\text{ref}}) - \ell_{t+1}(w_t)| \leq \sum_{t=0}^k 2\eta C_4 \|w_{\text{ref}} - w_t\| \leq 2\eta C_4 R(k+1) \leq 2\eta C_4 R\tau$$

460 and

$$\begin{aligned} \frac{\eta^2}{2} \sum_{t=0}^k \|g_{t+1}\|_*^2 & \leq \frac{\eta^2}{2} \sum_{t=0}^k (C_1 + C_2 (1 + \|w_t\|))^2 \\ & \leq \frac{\eta^2}{2} \sum_{t=0}^k (C_4 + C_2 \|w_t - w_{\text{ref}}\|)^2 \end{aligned}$$

$$\begin{aligned}
&\leq \eta^2 C_4^2 (k+1) + \eta^2 C_2^2 R^2 (k+1) \\
&\leq \tau \eta^2 (C_4^2 + C_2^2 R^2)
\end{aligned}$$

461 Therefore

$$\mathbf{D}_\psi(w_{\text{ref}}; w_{k+1}) \leq D_0 + \eta D_0 \sqrt{T} + 2\eta C_4 R \tau + \tau \eta^2 (C_4^2 + C_2^2 R^2) \leq \frac{R^2}{2}.$$

462 If  $k \geq \tau$ ,

$$\begin{aligned}
&\sum_{t=0}^k z_t \eta (\mathcal{R}(w_t) - \mathcal{R}^*) + z_k \mathbf{D}_\psi(w_{\text{ref}}; w_{k+1}) - z_{-1} \mathbf{D}_\psi(w_{\text{ref}}; w_0) \\
&\leq \sum_{t=0}^k z_t \eta (\mathcal{R}(w_{\text{ref}}) - \mathcal{R}^*) + \sum_{t=0}^k z_t \eta (\mathcal{R}(w_t) - \mathcal{R}(w_{\text{ref}})) \\
&\quad + \sum_{t=0}^k z_t \eta (\ell_{t+1}(w_{\text{ref}}) - \ell_{t+1}(w_t)) + \sum_{t=0}^k \frac{z_t \eta^2}{2} \|g_{t+1}\|_*^2 + \sum_{t=0}^k (z_t - z_{t-1}) \mathbf{D}_\psi(w_{\text{ref}}; w_t) \\
&\leq \sum_{t=0}^k z_t \eta (\mathcal{R}(w_{\text{ref}}) - \mathcal{R}^*) + \sum_{t=k-\tau+1}^k z_t \eta (\mathcal{R}(w_t) - \mathcal{R}(w_{\text{ref}})) \\
&\quad + \sum_{t=0}^{k-\tau} z_t \eta (\mathcal{R}(w_t) - \mathcal{R}(w_{\text{ref}}) - \mathbb{E}[\ell_{t+\tau}(w_{\text{ref}}) | \mathcal{F}_t] + \mathbb{E}[\ell_{t+\tau}(w_t) | \mathcal{F}_t]) \\
&\quad + \sum_{t=0}^{k-\tau} z_t \eta (\mathbb{E}[\ell_{t+\tau}(w_{\text{ref}}) | \mathcal{F}_t] - \mathbb{E}[\ell_{t+\tau}(w_t) | \mathcal{F}_t] + \ell_{t+\tau}(w_{\text{ref}}) - \ell_{t+\tau}(w_t)) \\
&\quad + \sum_{t=0}^{k-\tau} z_t \eta (\ell_{t+\tau}(w_t) - \ell_{t+\tau}(w_{\text{ref}})) + \sum_{t=0}^k z_t \eta (\ell_{t+1}(w_{\text{ref}}) - \ell_{t+1}(w_t)) \\
&\quad + \sum_{t=0}^{k-\tau} (z_t - z_{t-1}) \mathbf{D}_\psi(w_{\text{ref}}; w_t) + \sum_{t=0}^k \frac{z_t \eta^2}{2} \|g_{t+1}\|_*^2 \\
&\leq \sum_{t=0}^k z_t \eta (\mathcal{R}(w_{\text{ref}}) - \mathcal{R}^*) + \sum_{t=k-\tau+1}^k z_t \eta (\mathcal{R}(w_t) - \mathcal{R}(w_{\text{ref}})) \\
&\quad + \sum_{t=0}^{k-\tau} z_t \eta (\mathcal{R}(w_t) - \mathcal{R}(w_{\text{ref}}) - \mathbb{E}[\ell_{t+\tau}(w_{\text{ref}}) | \mathcal{F}_t] + \mathbb{E}[\ell_{t+\tau}(w_t) | \mathcal{F}_t]) \\
&\quad + \tau \log \frac{1}{\delta} + \sum_{t=0}^{k-\tau} 8(z_t \eta)^2 C_4^2 \mathbf{D}_\psi(w_{\text{ref}}; w_t) + \sum_{t=0}^{k-\tau} (z_t - z_{t-1}) \mathbf{D}_\psi(w_{\text{ref}}; w_t) \\
&\quad + \sum_{t=0}^k \frac{z_t \eta^2}{2} \|g_{t+1}\|_*^2 + \sum_{t=0}^{k-\tau} z_t \eta (\ell_{t+\tau}(w_t) - \ell_{t+\tau}(w_{t+\tau-1})) \\
&\quad + \sum_{t=\tau-1}^{k-1} z_{t-\tau+1} \eta (\ell_{t+1}(w_t) - \ell_{t+1}(w_{\text{ref}})) + \sum_{t=0}^k z_t \eta (\ell_{t+1}(w_{\text{ref}}) - \ell_{t+1}(w_t)) \\
&\leq \sum_{t=0}^k z_t \eta (\mathcal{R}(w_{\text{ref}}) - \mathcal{R}^*) + \sum_{t=k-\tau+1}^k z_t \eta (\mathcal{R}(w_t) - \mathcal{R}(w_{\text{ref}})) \\
&\quad + \sum_{t=0}^{k-\tau} z_t \eta (\mathcal{R}(w_t) - \mathcal{R}(w_{\text{ref}}) - \mathbb{E}[\ell_{t+\tau}(w_{\text{ref}}) | \mathcal{F}_t] + \mathbb{E}[\ell_{t+\tau}(w_t) | \mathcal{F}_t]) + \tau \log \frac{1}{\delta} \\
&\quad + \sum_{t=0}^k \frac{z_t \eta^2}{2} \|g_{t+1}\|_*^2 + \sum_{t=0}^{k-\tau} z_t \eta (\ell_{t+\tau}(w_t) - \ell_{t+\tau}(w_{t+\tau-1}))
\end{aligned}$$

$$\begin{aligned}
& + \sum_{t=\tau-1}^{k-1} \eta (z_{t-\tau+1} - z_t) (\ell_{t+1}(w_t) - \ell_{t+1}(w_{\text{ref}})) \\
& + \sum_{t=0}^{\tau-2} z_t \eta (\ell_{t+1}(w_{\text{ref}}) - \ell_{t+1}(w_t)) + z_k \eta (\ell_{k+1}(w_{\text{ref}}) - \ell_{k+1}(w_k))
\end{aligned}$$

463 where in the last inequality we use  $z_t = \frac{1}{8\eta^2 C_4^2 (T+1+t)}$  to see that  $z_t + 8(z_t \eta)^2 C_4^2 \leq z_{t-1}$ . Notice  
464 that,  $\frac{z_t}{z_k} \leq 2$ , and  $(\mathcal{R}(w_{\text{ref}}) - \mathcal{R}^*) \leq \frac{D_0}{\sqrt{T}}$  we have

$$\begin{aligned}
& \sum_{t=0}^k \eta (\mathcal{R}(w_t) - \mathcal{R}^*) + \mathbf{D}_\psi(w_{\text{ref}}; w_{k+1}) \\
& \leq 2D_0 + 2\eta D_0 \sqrt{T} + 16\eta^2 C_4^2 T \tau \log \frac{1}{\delta} + 2\eta \underbrace{\sum_{t=k-\tau+1}^k |\mathcal{R}(w_t) - \mathcal{R}(w_{\text{ref}})|}_A \\
& + 2\eta \underbrace{\sum_{t=0}^{k-\tau} |\mathcal{R}(w_t) - \mathcal{R}(w_{\text{ref}}) - \mathbb{E}[\ell_{t+\tau}(w_{\text{ref}}) | \mathcal{F}_t] + \mathbb{E}[\ell_{t+\tau}(w_t) | \mathcal{F}_t]|}_B \\
& + \underbrace{\eta^2 \sum_{t=0}^k \|g_{t+1}\|_*^2}_C + \underbrace{2\eta \sum_{t=0}^{k-\tau} |\ell_{t+\tau}(w_t) - \ell_{t+\tau}(w_{t+\tau-1})|}_D \\
& + \underbrace{\frac{2(\tau-1)\eta}{T} \sum_{t=\tau-1}^{k-1} |\ell_{t+1}(w_t) - \ell_{t+1}(w_{\text{ref}})| + 2\eta \sum_{t=0}^{\tau-2} |\ell_{t+1}(w_{\text{ref}}) - \ell_{t+1}(w_t)| + 2\eta |\ell_{k+1}(w_{\text{ref}}) - \ell_{k+1}(w_k)|}_E
\end{aligned}$$

465 Now we bound each term. For  $A$

$$A = 2\eta \sum_{t=k-\tau+1}^k |\mathcal{R}(w_t) - \mathcal{R}(w_{\text{ref}})| \leq 2\eta \sum_{t=k-\tau+1}^k C_4 \|w_{\text{ref}} - w_t\| \leq 2\eta \tau C_4 R$$

466 For  $B$ , by Assumption 3,  $\sup_{t \in \mathbb{Z}_{\geq 0}} \sup_{\mathcal{F}_t} \text{TV}(P_t^{t+\tau}, \pi) \leq \epsilon$ ,

$$2\eta |\mathcal{R}(w_t) - \mathcal{R}(w_{\text{ref}}) - \mathbb{E}[\ell_{t+\tau}(w_{\text{ref}}) | \mathcal{F}_t] + \mathbb{E}[\ell_{t+\tau}(w_t) | \mathcal{F}_t]| \leq 2\eta C_4 R \epsilon$$

467 Thus

$$B = 2\eta \sum_{t=0}^{k-\tau} |\mathcal{R}(w_t) - \mathcal{R}(w_{\text{ref}}) - \mathbb{E}[\ell_{t+\tau}(w_{\text{ref}}) | \mathcal{F}_t] + \mathbb{E}[\ell_{t+\tau}(w_t) | \mathcal{F}_t]| \leq 2\eta C_4 R \epsilon T$$

468 For  $C$ , similarly to before

$$C = \eta^2 \sum_{t=0}^k \|g_{t+1}\|_*^2 \leq 2T\eta^2 (C_4^2 + C_2^2 R^2)$$

469 For  $D$ , we have

$$\begin{aligned}
& |\ell_{t+\tau}(w_t) - \ell_{t+\tau}(w_{t+\tau-1})| \\
& \leq \sum_{i=t+1}^{t+\tau-1} |\ell_{t+\tau}(w_i) - \ell_{t+\tau}(w_{i-1})| \\
& \leq \sum_{i=t+1}^{t+\tau-1} \|w_i - w_{i-1}\| (C_1 + C_2 (1 + \|w_i\|))
\end{aligned}$$

$$\begin{aligned}
&\leq \sum_{i=t+1}^{t+\tau-1} \eta \|\nabla \ell_i(w_{i-1})\| (C_4 + C_2 \|w_i - w_{\text{ref}}\|) \\
&\leq \eta (C_4 + C_2 R) \sum_{i=t+1}^{t+\tau-1} (C_4 + C_2 \|w_{i-1} - w_{\text{ref}}\|) \\
&\leq \eta (C_4 + C_2 R)^2 \tau \leq \eta \tau (2C_4^2 + 2C_2^2 R^2)
\end{aligned}$$

470 We obtain

$$D = 2\eta \sum_{t=0}^{k-\tau} |\ell_{t+\tau}(w_t) - \ell_{t+\tau}(w_{t+\tau-1})| \leq 2\eta^2 \tau T (2C_4^2 + 2C_2^2 R^2)$$

471 For  $E$ , since

$$|\ell_{t+1}(w_t) - \ell_{t+1}(w_{\text{ref}})| \leq C_4 R$$

472 Hence

$$\begin{aligned}
E &= \frac{2(\tau-1)\eta}{T} \sum_{t=\tau-1}^{k-1} |\ell_{t+1}(w_t) - \ell_{t+1}(w_{\text{ref}})| \\
&\quad + 2\eta \sum_{t=0}^{\tau-2} |\ell_{t+1}(w_{\text{ref}}) - \ell_{t+1}(w_t)| + 2\eta |\ell_{k+1}(w_{\text{ref}}) - \ell_{k+1}(w_k)| \\
&\leq 2\eta C_4 R \left( \frac{(\tau-1)(k-\tau+1)}{T} + \tau \right) \leq 4\eta \tau C_4 R
\end{aligned}$$

473 Sum up we have

$$\begin{aligned}
&\sum_{t=0}^k \eta (\mathcal{R}(w_t) - \mathcal{R}^*) + \mathbf{D}_\psi(w_{\text{ref}}; w_{k+1}) \\
&\leq 2D_0 + 2\eta D_0 \sqrt{T} + 16\eta^2 C_4^2 T \tau \log \frac{1}{\delta} \\
&\quad + 2\eta \tau C_4 R + 2\eta C_4 R \epsilon T + 2T\eta^2 (C_4^2 + C_2^2 R^2) \\
&\quad + 2\eta^2 \tau T (2C_4^2 + 2C_2^2 R^2) + 4\eta \tau C_4 R \\
&\leq \frac{R^2}{2}
\end{aligned}$$

474 as needed. Finally we have

$$\frac{1}{k+1} \sum_{t=0}^k (\mathcal{R}(w_t) - \mathcal{R}^*) + \frac{\mathbf{D}_\psi(w_{\text{ref}}; w_{k+1})}{\eta(k+1)} \leq \frac{R^2}{2\eta(k+1)}.$$

475

□
